# Impact of Sarcoplasmic Reticulum Calcium Release on Calcium Dynamics and Action Potential Morphology in Human Atrial Myocytes: A Computational Study

Jussi T. Koivumäki<sup>1</sup>, Topi Korhonen<sup>1</sup>, Pasi Tavi\*

Department of Biotechnology and Molecular Medicine, A.I. Virtanen Institute for Molecular Sciences, University of Eastern Finland, Kuopio, Finland

## Abstract

Electrophysiological studies of the human heart face the fundamental challenge that experimental data can be acquired only from patients with underlying heart disease. Regarding human atria, there exist sizable gaps in the understanding of the functional role of cellular  $\text{Ca}^{2+}$  dynamics, which differ crucially from that of ventricular cells, in the modulation of excitation-contraction coupling. Accordingly, the objective of this study was to develop a mathematical model of the human atrial myocyte that, in addition to the sarcolemmal (SL) ion currents, accounts for the heterogeneity of intracellular  $\text{Ca}^{2+}$  dynamics emerging from a structurally detailed sarcoplasmic reticulum (SR). Based on the simulation results, our model convincingly reproduces the principal characteristics of  $\text{Ca}^{2+}$  dynamics: 1) the biphasic increment during the upstroke of the  $\text{Ca}^{2+}$  transient resulting from the delay between the peripheral and central SR  $\text{Ca}^{2+}$  release, and 2) the relative contribution of SL  $\text{Ca}^{2+}$  current and SR  $\text{Ca}^{2+}$  release to the  $\text{Ca}^{2+}$  transient. In line with experimental findings, the model also replicates the strong impact of intracellular  $\text{Ca}^{2+}$  dynamics on the shape of the action potential. The simulation results suggest that the peripheral SR  $\text{Ca}^{2+}$  release sites define the interface between  $\text{Ca}^{2+}$  and AP, whereas the central release sites are important for the fire-diffuse-fire propagation of  $\text{Ca}^{2+}$  diffusion. Furthermore, our analysis predicts that the modulation of the action potential duration due to increasing heart rate is largely mediated by changes in the intracellular  $\text{Na}^+$  concentration. Finally, the results indicate that the SR  $\text{Ca}^{2+}$  release is a strong modulator of AP duration and, consequently, myocyte refractoriness/excitability. We conclude that the developed model is robust and reproduces many fundamental aspects of the tight coupling between SL ion currents and intracellular  $\text{Ca}^{2+}$  signaling. Thus, the model provides a useful framework for future studies of excitation-contraction coupling in human atrial myocytes.

**Citation:** Koivumäki JT, Korhonen T, Tavi P (2011) Impact of Sarcoplasmic Reticulum Calcium Release on Calcium Dynamics and Action Potential Morphology in Human Atrial Myocytes: A Computational Study. *PLoS Comput Biol* 7(1): e1001067. doi:10.1371/journal.pcbi.1001067

**Editor:** Andrew D. McCulloch, University of California San Diego, United States of America

**Received:** June 15, 2010; **Accepted:** December 21, 2010; **Published:** January 27, 2011

**Copyright:** © 2011 Koivumäki et al. This is an open-access article distributed under the terms of the Creative Commons Attribution License, which permits unrestricted use, distribution, and reproduction in any medium, provided the original author and source are credited.

**Funding:** This study was supported by the Finnish Heart Research Foundation (<http://www.sydantutkimussaatio.fi/site/>), the Academy of Finland (<http://www.aka.fi/fi/A/>), and the Sigrid Juselius Foundation ([http://www.sigridjuselius.fi/index.php?page\\_id=48](http://www.sigridjuselius.fi/index.php?page_id=48)). The funders had no role in study design, data collection and analysis, decision to publish, or preparation of the manuscript.

**Competing Interests:** The authors have declared that no competing interests exist.

\* E-mail: [pasi.tavi@uef.fi](mailto:pasi.tavi@uef.fi)

† Both authors contributed equally to this work.

## Introduction

In cardiac myocytes, the process triggered by the action potential (AP) and resulting in the contraction of the myocyte is commonly referred to as excitation-contraction coupling (ECC) [1]. The transient elevation of intracellular  $\text{Ca}^{2+}$  concentration ( $[\text{Ca}^{2+}]_i$ ) that underlies the contraction is initiated by the  $\text{Ca}^{2+}$  influx from the extracellular space through the L-type calcium channels (LTCCs), which causes the release of more  $\text{Ca}^{2+}$  from the sarcoplasmic reticulum (SR) via the SR calcium release channels (ryanodine receptors; RyRs). This mechanism is known as  $\text{Ca}^{2+}$  induced  $\text{Ca}^{2+}$  release (CICR) [2]. During one contraction cycle, the  $\text{Ca}^{2+}$  influx has to be balanced with an efflux to the same compartments, in order that  $\text{Ca}^{2+}$  does not start to accumulate and impede contraction. The majority of  $\text{Ca}^{2+}$  is re-circulated back to the SR by the SR  $\text{Ca}^{2+}$ -ATPase (SERCA), leaving a smaller fraction of  $\text{Ca}^{2+}$  to be extruded from the cell by the  $\text{Na}^+/\text{Ca}^{2+}$  exchanger (NCX) and plasmalemmal  $\text{Ca}^{2+}$ -ATPase (PMCA).

Whilst the same CICR mechanism initiates the transient elevation of  $[\text{Ca}^{2+}]_i$  in both ventricular and atrial myocytes, there

are substantial spatiotemporal differences in the properties of the atrial and ventricular  $\text{Ca}^{2+}$  transients [3,4] due to the divergent intracellular ultrastructures. Mammalian atrial myocytes lack a prominent transverse tubular system [5], which in ventricular myocytes establishes the tight coupling of the SR to sarcolemma, enabling a  $\text{Ca}^{2+}$  release that is virtually uniform throughout the cell [6]. In atrial myocytes, however, the  $\text{Ca}^{2+}$  wave arises in the periphery (junctional-SR) and then propagates to the center of the cell, activating secondary release from the corbular (non-junctional) SR compartments [3,7,8].

Facing the complexity of a highly integrated and interdependent system, mathematical modeling has become an established complement to the experimental approach in elucidation of the mechanisms that underlie cardiac electrophysiology [9]. In human studies, the role of mathematical modeling is perhaps even more important because there are substantial limitations in the quantity and quality of the human cardiac tissue that is available for *in vitro* experiments. In this study, we present a model of the adult human atrial myocyte that has a spatially detailed and physiologically based formulation of the  $\text{Ca}^{2+}$  release from and uptake to the SR.

## Author Summary

In the human heart, the contraction of atrial and ventricular muscle cells is based largely on common mechanisms. There is, however, a fundamental difference in the cellular calcium dynamics that underlie the contractile function. Here, we have developed a computational model of the human atrial cell that convincingly reproduces the experimentally observed characteristics of the electrical activity and the cyclic fluctuations of the intracellular calcium concentration. With the model, we evaluate the relative roles of the most important cellular calcium transport mechanisms and their impact on the electrical behavior of the cell. Our simulations predict that the amount of calcium released from the cellular stores during each electrical cycle crucially regulates the excitability of the human atrial cell. Furthermore, the results indicate that the cellular sodium accumulation related to faster heart rates is one of the main mechanisms driving the adaptation of cardiac electrical activity. Finally, we conclude that the presented model also provides a useful framework for future studies of human atrial cells.

Based on a realistic description of the interrelations between  $[Ca^{2+}]_i$ , sarcolemmal (SL) ion currents, and the SR  $Ca^{2+}$  release, the aim of this study was to elucidate to what extent intracellular  $Ca^{2+}$  regulates the AP waveform, cellular excitability, and rate-dependent electrophysiological mechanisms. The results indicate that the peripheral (junctional) SR  $Ca^{2+}$  release sites define the interface between  $Ca^{2+}$  and AP, whereas the central (non-junctional) release sites are important for the fire-diffuse-fire propagation of  $Ca^{2+}$  diffusion. Moreover, our analysis suggests that the rising intracellular  $Na^+$  concentration is an important modulator of the action potential duration at increasing heart rates. Finally, the results predict that SR  $Ca^{2+}$  release is a strong modulator of AP duration and thus affects the human atrial myocyte refractoriness.

## Methods

The presented mathematical model is a set of ordinary differential equations that were implemented to the Matlab (The MathWorks) environment of technical programming. A brief description of the novel and modified model components are given below. The complete mathematical formulation of the model and parameters are shown in Text S1, and initial values of the differential variables in Table S4 in the Supporting Information.

Simulation results were obtained by numerically integrating the model equations with a stiff ordinary differential equation solver method (ode15s). Despite the detailed description of intracellular  $Ca^{2+}$  dynamics, the computational load of the model is rather low: a 10-second simulation at 1 Hz pacing takes about 10 seconds to run on a normal desktop PC (Intel Core Duo CPU, 2.8 GHz, 2 GB of RAM).

## Cellular structure of the model

The dynamic components of the model cell are the membrane current-voltage system and the intracellular  $Ca^{2+}$ ,  $Na^+$ , and  $K^+$  and SR  $Ca^{2+}$  concentrations (Figure 1). The intracellular and SR  $Ca^{2+}$  also have a spatial dimension. The cell was modeled as a cylinder, with a length of 122.051  $\mu\text{m}$  and a radius of 6.02  $\mu\text{m}$  (Figure 1B). These yield a 50 pF capacitance for the cell membrane when the top and bottom of the cylinder are not included in the area [10]. The intracellular space is divided into

the junctional cytosol, which is a 0.02  $\mu\text{m}$  deep region below the cell membrane [11,12], and the bulk cytosol, which represents the rest of the cytosol below the junctional cytosol. The bulk cytosol and the SR are further divided into four 1.625  $\mu\text{m}$  deep compartments (Figure 1B). The RyR and SERCA in the first SR compartment interact with the junctional cytosol compartment, whereas the RyRs and SERCAs in the other three SR compartments interact with the corresponding bulk cytosolic compartments (Figure 1B). This structure in our model is similar to the structure seen in immunolabeled images of RyRs and SERCAs in atrial myocytes, in which the non-junctional release sites form a regular structure with  $\sim 2 \mu\text{m}$  distances in the transverse direction and the junctional release site is apart from this structure [12,13]. The volume of the SR was set to 2.25% of the volume of the bulk cytosol in each of these compartments, and thus also in the whole cell [14]. The complete set of geometrical and physical parameters is shown Table 1.

## Intracellular $Ca^{2+}$ diffusion and buffering

The  $Ca^{2+}$  diffusion in the bulk cytosol and in the SR was modeled with Fick's second law of diffusion. The components of cytosolic  $Ca^{2+}$  buffering are shown in Table 2. The effect of the mobility of  $Ca^{2+}$  buffers in the bulk cytosol was implemented as described previously [15]. The amount of SR  $Ca^{2+}$  buffer (calsequestrin) was fitted based on experimental SR  $Ca^{2+}$  content [16]; see Results for details. The diffusion between the junctional and bulk cytosol was modeled as an analytical diffusion equation [17]. The accessible volume for the  $Ca^{2+}$  diffusion in the cytosol and in the SR was set to 50% of the total volume of the compartments [11]. Also the accessible area for  $Ca^{2+}$  diffusion between junctional and bulk cytosol was set to 50% of the total area between these compartments.

The diffusion coefficients are shown in Table 2. Previously, it has been shown that the effective diffusion coefficient for  $Ca^{2+}$  in the SR is 8–9  $\mu\text{m}^2/\text{s}$  [18]. The effective diffusion coefficient is smaller than the free diffusion coefficient due to the  $Ca^{2+}$  buffering in the SR [15]. In our model, the free diffusion coefficient for  $Ca^{2+}$  in the SR is 44  $\mu\text{m}^2/\text{s}$ , which yields an effective coefficient of 8–12  $\mu\text{m}^2/\text{s}$  in the relevant range of  $[Ca^{2+}]_{\text{SR}}$  (0.3–0.6 mM).

The components of cytosolic  $Ca^{2+}$  buffering have not been characterized from atrial myocytes in the same detail as in ventricular myocytes [1]. Previously, ventricular data has been used to model the atrial  $Ca^{2+}$  buffering [11]. However, implementation of a ventricular buffering system in our model resulted in almost non-existent  $Ca^{2+}$  transients with the experimental SR  $Ca^{2+}$  content [16] (data not shown). In our model, the 'known' cytosolic  $Ca^{2+}$  buffers are the sarcolemma, which is assumed to be as in ventricular myocytes based on [11], and the SERCA [19], which is fitted based on  $Ca^{2+}$  transient kinetics and SR  $Ca^{2+}$  content. The rest of the buffering, consisting most likely of troponin, calmodulin and myosin, is modeled as a single arbitrary mobile buffer, which has the mobility and  $K_d$  of calmodulin [11].

## Sarcoplasmic reticulum

The  $Ca^{2+}$  buffering to and uptake by the SERCA and the passive  $Ca^{2+}$  leak from the SR to the cytosol were modeled as previously [19]. See Table S1 in the Supporting Information for parameter values.

To describe the  $Ca^{2+}$  release flux through the RyR channel, we developed a novel phenomenological model (Figure 2) that employs a Hodgkin-Huxley type of formalism. The model has three gating variables (Figure 2A): adaptation gate, open gate and closed gate. The complete set of equations (Text S1) and the

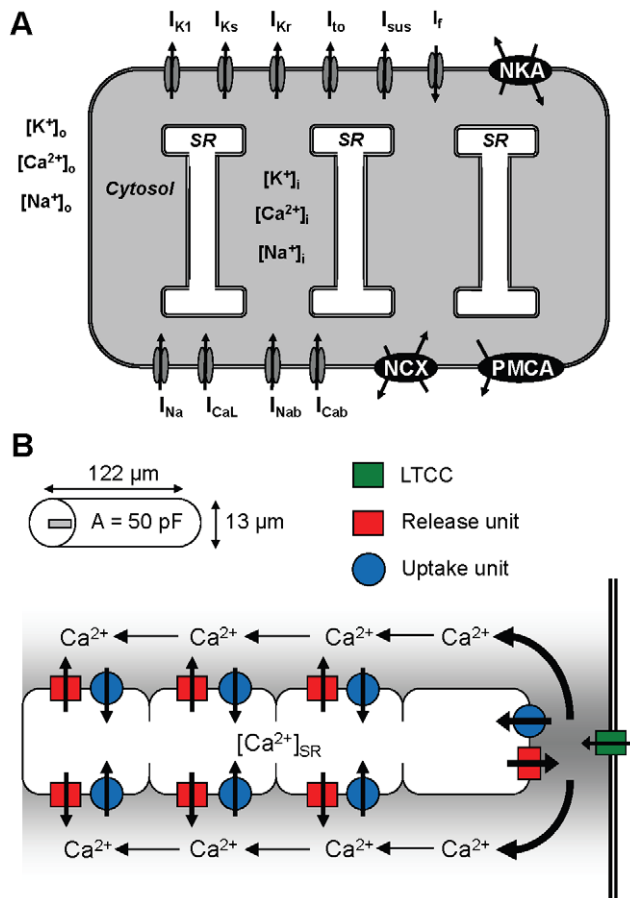

**Figure 1. The human atrial myocyte model.** (A) Membrane currents and a schematic overview of the model. The SL currents presented by the model are the transient outward K<sup>+</sup> current ( $I_{to}$ ), the slow delayed rectifier K<sup>+</sup> current ( $I_{Ks}$ ), the rapid delayed rectifier K<sup>+</sup> current ( $I_{Kr}$ ), the sustained outward K<sup>+</sup> current ( $I_{sus}$ ), the time-independent K<sup>+</sup> current ( $I_{K1}$ ), the hyperpolarization-activated inward K<sup>+</sup> current ( $I_h$ ), the fast Na<sup>+</sup> current ( $I_{Na}$ ), the L-type Ca<sup>2+</sup> current ( $I_{CaL}$ ), the PMCA, NKA, NCX, and the Na<sup>+</sup> and Ca<sup>2+</sup> background currents ( $I_{Nab}$  and  $I_{Cab}$ ). (B) The geometry and SR structure of the model. The intracellular cytosol is divided into the junctional and bulk cytosols. The former is a 0.02 μm deep region below the cell membrane, and the latter represents the rest of the cytosol below the junctional cytosol. The bulk cytosol and the SR are divided into four compartments that are 1.625 μm deep; note: each red entity contains RyR, SERCA, and SR leak. The RyR and SERCA in the first SR compartment interact with the LTCC in the junctional cytosol compartment, whereas the RyRs and SERCAs in the other three SR compartments interact with the corresponding cytosolic compartments. This scheme replicates the structure seen in immunolabeled images of RyRs and SERCAs in atrial myocytes, in which the non-junctional release sites form a regular structure with ~2 μm distances and the junctional release site is apart from this structure [12,13].  
doi:10.1371/journal.pcbi.1001067.g001

parameter values (Table S2) are listed in the Supporting Information. Time constants of RyR gating were adjusted so that the calcium release from a release unit situated in non-junctional compartments represents a signal that is spread wider both spatially and temporally compared to the junctional space (Table S2). The simple structure makes the RyR model computationally efficient, especially for modeling the Ca<sup>2+</sup> wave propagation, and limits the amount of unnecessary free variables. However, as shown in Figure 2B, the model is still capable of reproducing complex features of RyR Ca<sup>2+</sup> release, i.e. the dependence of the

release on both the intracellular and SR [Ca<sup>2+</sup>] and the adaptation of the RyR open probability's dependence on intracellular Ca<sup>2+</sup> [20,21].

### Sarcolemmal ion currents

The SL ion currents were mostly formulated as in the previously published model of human atrial AP [10]. All the major modifications and novel features of the ion current submodels are described in the Text S1. Minor adjustments of parameter values are listed in Table S1.

## Results

### Sarcolemmal ion currents and action potential characteristics

As in other excitable cells, APs in atrial myocytes reflect the coordinated activation of several voltage-gated inward (depolarizing) and outward (repolarizing) ion channel currents (Figure S3 in the Supporting Information). The major depolarizing currents in the initial phase of the AP are the  $I_{Na}$  and  $I_{CaL}$ , and  $I_{NCX}$  during the later phase of the AP (Figure S3 B&C&G). The  $I_{to}$  and  $I_{sus}$  generate large repolarizing currents in the beginning of the AP, which quickly repolarize the membrane voltage back to -30 mV after the spike (Figure S3 A&D). Following this, the repolarization is carried mostly by  $I_{K1}$  (Figure S3E) with very little contribution by  $I_{Ks}$  and  $I_{Kr}$  (Figure S3F). Although there is a significant amount of  $I_r$  present in human atrial myocytes [22], it does not contribute substantially to the action potential (Figure S3F), since it is activated at voltages below -80 mV (see Figure S2). The PMCA creates only a very small current (Figure S3G).

As a principal validation, we compared the characteristics of the emergent AP waveform of our model to published data during 1 Hz pacing (Table S3; see also Discussion). The model reproduces the experimental values for the resting membrane potential (-77 mV), AP upstroke velocity (170 mV/ms), AP amplitude (119 mV), and AP duration (APD; APD<sub>30</sub> = 11 ms APD<sub>90</sub> = 239 ms,) at different stages of repolarization (see Table S3 in the Supporting Information for detailed comparison).

### Intracellular Ca<sup>2+</sup> dynamics

In our model, the average cytosolic Ca<sup>2+</sup> signal has a resting concentration of 0.15 μM and an amplitude of 0.58 μM (Figure 3A) at 1 Hz pacing. The reported single exponential decay constants of the Ca<sup>2+</sup> transient range from 92 ms to 160 ms [4,23,24] and in comparative studies between atrial and ventricular myocytes, the atrial myocytes have more rapid decays [3,4,25]. In our model, the decay constant of the Ca<sup>2+</sup> transient is 131 ms, which is in line with data from atrial myocytes and more rapid than that reported in human ventricular myocytes [26] (Table 3). As a high-level validation of the relative contribution of Ca<sup>2+</sup> transport mechanisms that underlie Ca<sup>2+</sup> dynamics of the model, we simulated the effect of elevation of extracellular Ca<sup>2+</sup> from 0.9 to 3.2 mM (data not shown). In line with experimental findings [27], the diastolic and systolic [Ca<sup>2+</sup>]<sub>i</sub> increased by 52% and 88%, respectively.

Although the local Ca<sup>2+</sup> release homogenizes the cytosolic Ca<sup>2+</sup> signal, the Ca<sup>2+</sup> transients at different parts of the cytosol differ from the average signal (Figure 3A). In atrial myocytes, the [Ca<sup>2+</sup>]<sub>i</sub> can peak in the periphery of the cell to ~1 μM during slow pacing, whereas in the center there is only a small increase in Ca<sup>2+</sup> concentration [28]. This spatial heterogeneity is reproduced by our model (Figure 3 A&B). Also the temporal characteristics of the simulated Ca<sup>2+</sup> dynamics agree well with *in vitro* findings. The time-to-peak for Ca<sup>2+</sup> in peripheral cytosol in atrial cells has been

**Table 1.** Cell geometry and physical parameters.

| Parameter     | Definition                            | Value                       | Value [ref.]                                                            |
|---------------|---------------------------------------|-----------------------------|-------------------------------------------------------------------------|
| $F$           | Faraday constant                      | 96478 C/mol                 |                                                                         |
| $R$           | Ideal gas constant                    | 8314 mJ/(mol K)             |                                                                         |
| $T$           | Temperature                           | 306.15 K                    |                                                                         |
| $[Na^+]_o$    | Extracellular $Na^+$ concentration    | 130 mM                      |                                                                         |
| $[Ca^{2+}]_o$ | Extracellular $Ca^{2+}$ concentration | 1.8 mM                      |                                                                         |
| $[K^+]_o$     | Extracellular $K^+$ concentration     | 5.4 mM                      |                                                                         |
| $C_m$         | Cell membrane capacitance             | 0.05 nF                     | 0.0519±0.035 nF [10]<br>0.041 nF [11]<br>0.058±0.078 nF [16]            |
| $r_{junct}$   | Radius of the bulk cytosol            | 6.5 $\mu$ m                 | 4.6±0.3 $\mu$ m [74]<br>7.8 $\mu$ m [11]<br>7.4±0.15 $\mu$ m [70]       |
| $l_{cell}$    | Length of the cell                    | 122.051 $\mu$ m             | 88±6.1 $\mu$ m [74]<br>111.3±6.5 $\mu$ m [75]<br>101.1±1.5 $\mu$ m [70] |
| $V_{ss}$      | Volume of the subspace                | $4.99232 \times 10^{-5}$ nL |                                                                         |
| $\Delta r$    | Width of bulk cytosol compartments    | 1.625 $\mu$ m               | ~2 $\mu$ m [12,13]                                                      |

doi:10.1371/journal.pcbi.1001067.t001

estimated to be ~20 ms [28] and  $57.1 \pm 4.0$  ms [3], and at the center of cell  $123.7 \pm 7.8$  ms [3]. In the model, the peripheral peak is at 34.8 ms and the central peak at 123.6 ms, in line with the experimental data.

As shown in Figure 3 C&D, the delay between the peripheral and central  $Ca^{2+}$  release in atrial myocytes yields a biphasic increment during the upstroke of the whole cell  $Ca^{2+}$  transient [7]. This phenomenon is reproduced in our model with similar upstroke dynamics (Figure 3E) as recorded in human atrial myocytes [7]. We simulated a voltage clamp experiment with a corresponding protocol and obtained the release rates with a linear fit to normalized  $Ca^{2+}$  transients.

### SR $Ca^{2+}$ dynamics

In human atrial myocytes, the diastolic SR  $Ca^{2+}$  content, measured as the integral of NCX current during a caffeine-induced  $Ca^{2+}$  transient, has been reported to be  $8.3 \pm 1.2$  amol/pF [16]. Based on the calculations of Hove-Madsen *et al.* [16], this

corresponds to  $50.9 \pm 7.4$   $\mu$ M of accessible cytosolic volume with the dimensions of our model. The SR  $Ca^{2+}$  content in our model is 76.2  $\mu$ M. However, if we use the model to reproduce the caffeine-pulse experiment [16] and calculate the integral of the generated NCX current, we get a comparable value of 7.5 amol/pF for the SR  $Ca^{2+}$  content in the model (data not shown). A possible source for the difference between the integrated NCX value and the actual SR  $Ca^{2+}$  content is the fraction of  $Ca^{2+}$  that is extruded from the cell by the PMCA, which was not considered in the experimental analysis [16].

The  $Ca^{2+}$  release from the SR generates 79±6% of the  $Ca^{2+}$  transient amplitude in human atrial myocytes [7] and 77% in our model (Figure 4D). Most of the  $Ca^{2+}$  release is generated in the junctional compartment (Figure 4 A&B). During the uptake of  $Ca^{2+}$  from the cytosol to the SR, the SERCA buffers the  $Ca^{2+}$  and generates a delay in the fluxes between cytosol to SERCA (Figure 4C) and SERCA to SR (Figure 4D). At the end of the diastolic phase there is some diffusion of  $Ca^{2+}$  in the SR, which

**Table 2.** Parameters of the  $Ca^{2+}$  buffering.

| Parameter     | Definition                                                   | Value [ref]          |
|---------------|--------------------------------------------------------------|----------------------|
| $D_{Ca}$      | diffusion coefficient for $Ca^{2+}$                          | 780 $\mu$ m/s [76]   |
| $D_{CaBm}$    | diffusion coefficient for $Ca^{2+}$ -buffer complex          | 25 $\mu$ m/s [11]    |
| $D_{CaSR}$    | diffusion coefficient for $Ca^{2+}$ in SR                    | 44 $\mu$ m/s [18,77] |
| [BCa]         | Arbitrary cytosol $Ca^{2+}$ buffer                           | 0.024 mM [2]         |
| [SLlow]       | Phospholipid concentration (low-affinity sites)              | 165 mM [78]          |
| [SLhigh]      | Phospholipid concentration (high-affinity sites)             | 13 mM [78]           |
| $K_{dBCa}$    | Dissociation constant for arbitrary cytosol $Ca^{2+}$ buffer | 0.00238 mM [79]      |
| $K_{dSLow}$   | Dissociation constant for low-affinity phospholipid sites    | 1.1 mM [80]          |
| $K_{dSLhigh}$ | Dissociation constant for high-affinity phospholipid sites   | 0.013 mM [80]        |

doi:10.1371/journal.pcbi.1001067.t002

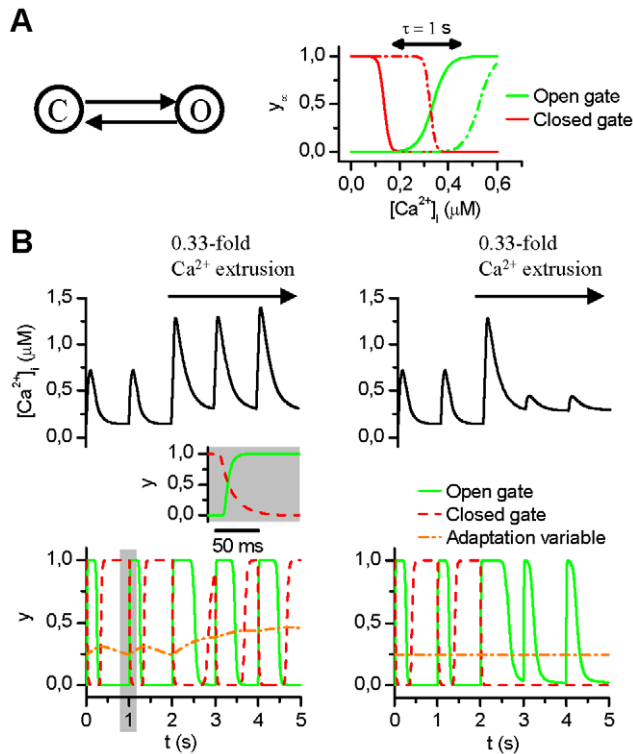

**Figure 2. The RyR model characteristics.** (A) The steady-state probabilities of open (green) and closed (red) gates are shown as a function of intracellular  $[Ca^{2+}]_i$  for two illustrative states of adaptation. The time constant  $\tau$  refers to the adaptation that modulates the steady-state probabilities of open and closed gates. (B) The effect of RyR adaptation. When the adaptation is not inhibited (left) the dependence of the RyR open probability ( $y$  axis) on the intracellular  $Ca^{2+}$  adapts in line with experimental findings [33,34]. Inset shows the dynamics of the open and closed gate in the control situation. The 0.33-fold  $Ca^{2+}$  was implemented by reducing the maximal currents/rates of the NCX, SERCA and PMCA to 33% of control.  
doi:10.1371/journal.pcbi.1001067.g002

balances the concentration differences in different parts of the SR (Figure 4D).

### Role of junctional and non-junctional SR $Ca^{2+}$ release

Having established that the AP characteristics and  $Ca^{2+}$  dynamics of our model are in line with *in vitro* findings, we wanted to exploit the potential of the model to elucidate the roles of junctional and non-junctional SR  $Ca^{2+}$  release sites. Accordingly, we conducted two *in silico* experiments, in which either the non-junctional (Figure 5A) or junctional (Figure 5C) SR  $Ca^{2+}$  release was blocked. Results indicate that inhibition of the release of non-junctional sites in the bulk cytosol has only a small impact on the ECC (Figure 5A). The amplitude of the global  $Ca^{2+}$  transient is decreased by 31% and the APD at 90% repolarization (APD<sub>90</sub>) is decreased by 10% (Figure 5B). The AP appears to be shortened because the lower  $[Ca^{2+}]_i$  in the junctional compartment does not activate the depolarizing  $I_{NCX}$  (Figure 5 B) to the normal extent.

The most significant effect of inhibiting the release sites in the bulk cytosol is that the  $Ca^{2+}$  signal becomes relatively inhomogeneous and it is not carried at all to the center of the cell (Figure 5A, lower panel). Thus, the release sites in the bulk cytosol are not a significant source of  $Ca^{2+}$  but act more as amplifiers of the  $Ca^{2+}$  signal during fire-diffuse-fire propagation.

Compared to the previous scenario, inhibition of the junctional SR  $Ca^{2+}$  release site yields partly opposite results (Figure 5C). The amplitude of the global  $Ca^{2+}$  transient is decreased by 58% and the APD<sub>90</sub> is decreased by 34% (Figure 5D). The AP is shortened, because the  $[Ca^{2+}]_i$  in the junctional compartment is elevated only slightly and thus the activation of the depolarizing  $I_{NCX}$  is reduced dramatically (Figure 5 D). However, similar to the situation where the release sites in the bulk cytosol were inhibited (Figure 5A), inhibition of the junctional release results in a failure in the propagation of the  $Ca^{2+}$  signal to the center of the cell. Without the junctional SR  $Ca^{2+}$  release, the  $Ca^{2+}$  signal coming from the LTCCs is too weak to trigger the CICR at the first release site in the bulk cytosol (Figure 5C, lower panel).

### Intracellular $Ca^{2+}$ transient and action potential duration

Above we have shown that our myocyte model can reproduce the experimentally observed impact of SR  $Ca^{2+}$  release on the inactivation of  $I_{CaL}$  (Figure S1C) and amplitude of the  $Ca^{2+}$  transient (Figure 4B). In addition, our results indicate that the SR  $Ca^{2+}$  release, especially junctional, affects the membrane voltage also via the NCX (Figure 5 B&D). To further study the effect of intracellular  $Ca^{2+}$  dynamics on AP morphology, we simulated the acute effect of total block and 3-fold increase of  $Ca^{2+}$  release (Figure 6). The results indicate that the amplitude of the  $Ca^{2+}$  transient (Figure 6A) has a substantial effect on the APD (Figure 6B). Blocking the SR  $Ca^{2+}$  release slows down the early phase of repolarization (Figure 6B, inset), but speeds up the late repolarization (Figure 6B), whereas the 3-fold increase of  $Ca^{2+}$  release has an opposite effect. Slowed AP repolarization causes the sodium channels to remain inactivated for a longer time. Consequently, the duration of the refractory period is increased and a prematurely applied second stimulus is unable to trigger the next AP (Figure 6D).

To further dissect the role of  $[Ca^{2+}]_i$  in AP morphology, we simulated separately the effect of decay and amplitude modulation of intracellular  $Ca^{2+}$  transients on the APD (Figure 7). That is, the junctional  $[Ca^{2+}]_i$  was “clamped” to three different modes (Figure 7 A&E) in both cases. This modification was implemented by replacing differential variable of junctional  $[Ca^{2+}]_i$  with an analytical equation that was fitted manually to the simulated control  $[Ca^{2+}]_i$  trace. Then either the decay (Figure 7A) or the amplitude (Figure 7E) of the junctional  $Ca^{2+}$  transient was modified. As the results show, the accelerated decay shortens the AP substantially, whereas deceleration of decay has an opposite effect (Figure 7B). The decay modulation has little or no effect on the early repolarization of the membrane voltage (Figure 7B, inset). The underlying mechanism appears to be the changed  $I_{NCX}$  (Figure 7C), whereas  $I_{CaL}$  is not affected (Figure 7D).

Similar to the effect of decay modulation, the amplitude of the  $[Ca^{2+}]_i$  transient affects the APD substantially (Figure 7F). However, compared to the modulation by the  $[Ca^{2+}]_i$  transient decay, increasing the amplitude also affects the early phases of repolarization (Figure 7F, inset) by enhancing the outward peak current via the NCX and accelerating the inactivation of  $I_{CaL}$  (Figure 7H). This results in a more complex modulation scheme, in which the increased  $[Ca^{2+}]_i$  transient amplitude accelerates the early repolarization and decelerates the late repolarization (Figure 7F).

### Rate dependence of action potential duration

Increasing the pacing rate causes an immediate (within a few APs) and then a gradual (reaching steady state over several minutes) decrease in the APD of atrial myocytes; this has been shown in numerous studies. Experimental findings indicate that

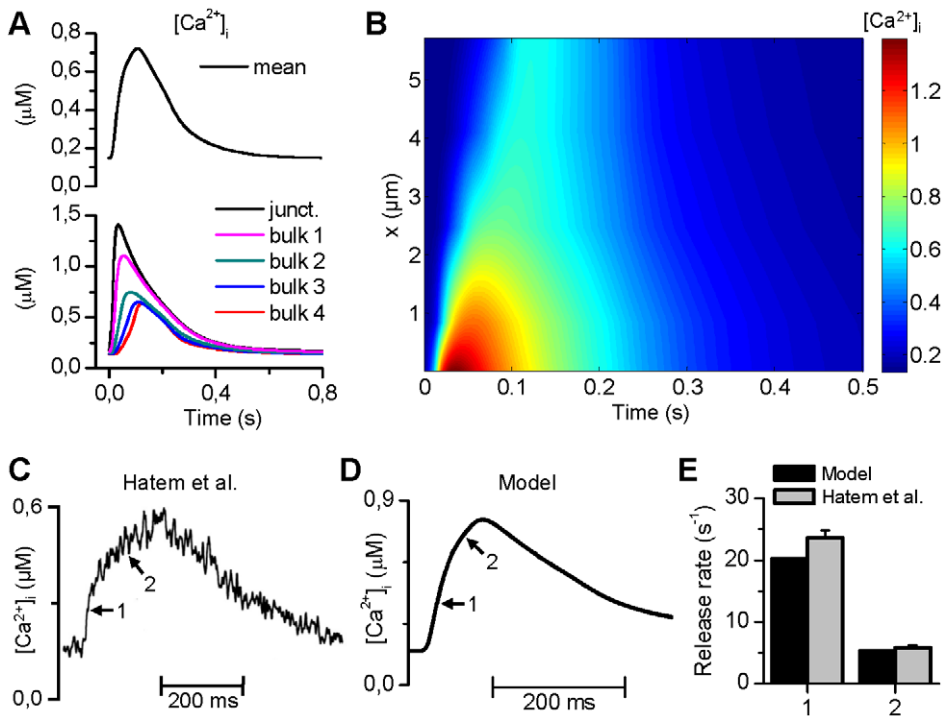

**Figure 3.  $Ca^{2+}$  dynamics of the model.** (A) The  $Ca^{2+}$  transients at different parts of the cytosol differ from the average cytosolic  $Ca^{2+}$  signal. The x-coordinates of the compartments are as follows: subspace  $0.01 \mu m$ , bulk1 =  $0.8325 \mu m$ , bulk2 =  $2.4575 \mu m$ , bulk3 =  $4.0825 \mu m$ , and bulk4 =  $5.7075 \mu m$ ; SL =  $0 \mu m$ . (B) Spatiotemporal representation of  $[Ca^{2+}]_i$  demonstrates clearly the divergence of both the amplitude and delay of  $Ca^{2+}$  release in different parts of the cytosol. (C) and (D) The model reproduces the experimentally found biphasic increment during the upstroke of the global  $Ca^{2+}$  transient [7]. (E) Release rates of the two phases of the  $Ca^{2+}$  transient in experiments by Hatem *et al.* [7] and simulations. The two values of release rates (arrows in (C) indicate the stages of release) were obtained with a linear fit to normalized  $Ca^{2+}$  transients. doi:10.1371/journal.pcbi.1001067.g003

**Table 3.** Comparison of  $Ca^{2+}$  characteristics of the developed model and experiments.

| Parameter                                            | Simulated value                                                               | Experimental value [ref]                                                                                                                                                                                     |
|------------------------------------------------------|-------------------------------------------------------------------------------|--------------------------------------------------------------------------------------------------------------------------------------------------------------------------------------------------------------|
| $Ca_{diast}$                                         | 0.146 $\mu M$                                                                 | $0.164 \pm 0.008 \mu M$ [70] T = 23°C<br>$0.066 \pm 0.008 \mu M$ ; rat atrial [4] T = 23°C                                                                                                                   |
| $Ca_{syst}$                                          | 0.723 $\mu M$                                                                 | $0.251 \pm 0.039 \mu M$ ; rat atrial (67% of ventricular) [4] T = 23°C                                                                                                                                       |
| $\Delta[Ca^{2+}]_i$                                  | 0.577 $\mu M$                                                                 | $0.185 \pm 0.039 \mu M$ ; rat atrial [4] T = 23°C<br>peripheral peak 1.4 $\mu M$ ; center/peripheral ampl = 0.41<br>$\sim 1 \mu M$ peripheral peak and only a small rise in center; rat atrial [28] T = 22°C |
| $[Ca^{2+}]$ time-to-peak peripheral/center half peak | 34.8 ms (ss), 54.8 ms (1 <sup>st</sup> bulk)/123.6 ms (last bulk)             | $57.1 \pm 4.0$ ms/ $123.7 \pm 7.8$ ms; rat atrial [3]                                                                                                                                                        |
|                                                      | 15.0 ms (ss), 23.1 ms (1 <sup>st</sup> bulk)/82.6 ms (last bulk)              | $6.3 \pm 0.5/71.6 \pm 16.7$ ms; rat atrial [3]                                                                                                                                                               |
| $Ca^{2+}$ $\tau$                                     | 130.8 ms                                                                      | shorter than ventricular cell [81]<br>$\sim 160$ ms; dog [23]                                                                                                                                                |
| Ca 50% relax time                                    | 122.9 ms                                                                      | $177.5 \pm 9.0$ [27] T = 37°C                                                                                                                                                                                |
| $Ca^{2+}$ transient duration                         | $\sim 600$ ms                                                                 | $539.1 \pm 31.0$ [27] T = 37°C                                                                                                                                                                               |
| $Ca^{2+}$ decay rate constant (1/ $\tau$ )           | 7.28 1/s                                                                      | $7.4 \pm 0.6$ 1/s; rat atrial [4] T = 23°C<br>$10.9 \pm 0.7$ 1/s; cat atrial [24] T = 22–25°C                                                                                                                |
| SR $Ca^{2+}$ content                                 | 76.2 $\mu M$                                                                  | $50.9 \pm 7.4 \mu mol/l$ /cytosol [16] T = 23°C                                                                                                                                                              |
| $Ca^{2+}$ propagation speed                          | 79.0 $\mu m/s \leftrightarrow 12.7$ ms/ $\mu m$ (estimated from contour plot) | $91.2 \pm 12.2 \mu m/s$ ; rat atrial [3]<br>$10.1 \pm 2.7$ ms/ $\mu m$ [82]<br>peripheral peak at 34.8 ms<br>$\sim 20$ ms; rat atrial [28]                                                                   |

doi:10.1371/journal.pcbi.1001067.t003

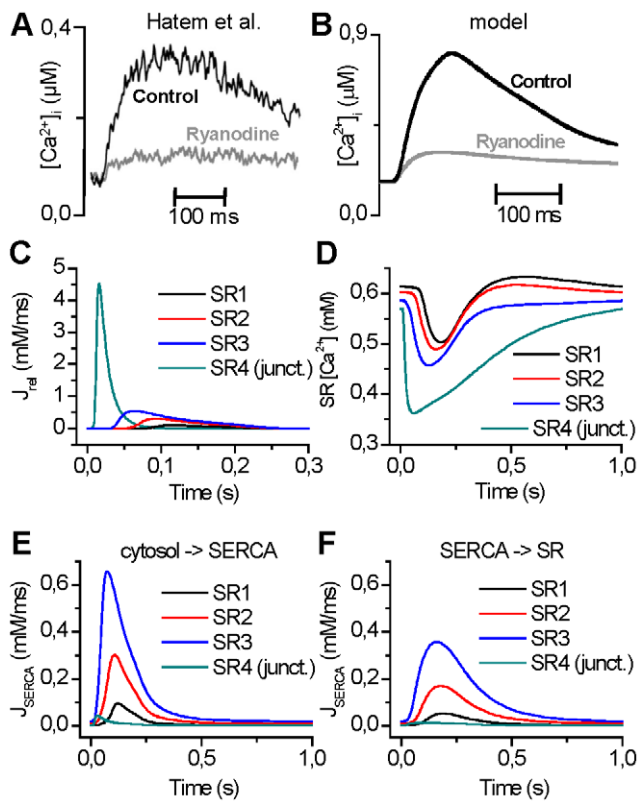

**Figure 4. SR  $\text{Ca}^{2+}$  dynamics of the model.** (A) and (B) Inhibition of the SR  $\text{Ca}^{2+}$  release with ryanodine greatly reduces the  $\text{Ca}^{2+}$  transient amplitude in both experiments [7] and simulations. Detailed analysis indicates that the SR  $\text{Ca}^{2+}$  release generates 77% of the  $\text{Ca}^{2+}$  transient amplitude, which is in line with the experimental findings  $79 \pm 6\%$  of Hatem *et al.* [7]. (C) and (D) Most of the  $\text{Ca}^{2+}$  release is generated from the junctional compartment. (E) and (F) During the uptake of  $\text{Ca}^{2+}$  from the cytosol to the SR, the SERCA buffers the  $\text{Ca}^{2+}$  and generates a delay in the fluxes between the cytosol to SERCA and SERCA to SR. At the end of the diastolic phase, there is some diffusion of  $\text{Ca}^{2+}$  in the SR, which balances the concentration differences in different parts of the SR. doi:10.1371/journal.pcbi.1001067.g004

this adaptation coincides with functional changes in the LTCC following calcium overload [29,30], and it is thus seen as one of the main mechanisms that underlie the changes in the ADP [31,32]. However, in ventricular myocytes, one of the important factors in rate dependence has been shown to be the accumulation of cytosolic  $\text{Na}^+$  during fast pacing [33,34,35,36]. To further study this phenomenon in atrial myocytes, we simulated pacing experiments within a physiologically relevant range of frequencies or basic cycle lengths (BCLs).

To account for the other rate-dependent mechanisms that affect the APD, we implemented two additional variants of the myocyte that are described in detail in the Supporting Information (Text S1). Briefly, we added a subsarcolemmal  $\text{Na}^+$  compartment (model variant: “vCaNass”) to the developed model (vCa), and we also included the recently updated description of  $\text{K}^+$  currents according to [37] (vCaNassIk). Simulation results shown in Figure 8 were obtained as in a previously used experimental protocol [38]. Figure 8A shows the overall changes in  $[\text{Ca}^{2+}]_i$  dynamics: diastolic and systolic  $[\text{Ca}^{2+}]_i$  increase and decrease with faster pacing, respectively, and accumulation of intracellular  $\text{Na}^+$ . The simulated values of  $\text{APD}_{30}$  that were calculated for each BCL fall within the range of reported experimental values (Figure 8B). The steep dependence of  $\text{APD}_{90}$  on the BCL is reproduced faithfully by the

model (Figure 8C). Although the variance of absolute  $\text{APD}_{90}$  values reported in the literature is large, the shape of the curve is similar in experiments and simulations. The relative change of  $\text{APD}_{90}$  in the range of  $\text{BCL} = [1600, 400]$  in our model ( $-32\%$ ,  $-30\%$  and  $-27\%$  for the model variants vCa, vCaNass and vCaNassIk, respectively) fits well to the *in vitro* values of Boutjdir *et al.* [39] ( $-44\%$ ) and Dawodu *et al.* [38] ( $-38\%$ ).

A multitude of measurement protocols are used to study the rate dependence of AP morphology in cardiac myocytes. Most importantly, the length of the period, after which the APD is determined, ranges from tens of seconds [31,40] to five minutes [41]. As the continued pacing potentially increases the  $[\text{Na}^+]_i$ , we wanted to study the rate dependence of AP with a second pacing protocol, in which simulation is always started from the quiescent steady-state and continued for five minutes for each BCL, separately (representative data is shown in Figure 8D). To account for all rate-dependent mechanisms described above, we performed these simulations with the vCaNassIk model variant.

Comparison of  $\text{APD}_{90}$  after 30 seconds and 5 minutes of pacing highlights the dynamic nature of rate dependence (Figure 8E). That is, the shortening of the AP in response to faster pacing becomes more pronounced as pacing is continued. This is affected substantially by the increasing  $[\text{Na}^+]_{ss}$  (Figure 8D). If the intracellular  $[\text{Na}^+]$  is “clamped” to the quiescent steady-state value (7.8 mM), the effect of continued fast pacing on the APD is dramatically reduced (Figure 8E, black line). Furthermore, the simulation results suggest that  $\text{Na}^+$  accumulation is actually a mechanism that is required for rate-dependent adaptation of APD, because the myocyte model failed to produce a normal AP at BCL 300 ms when  $[\text{Na}^+]$  was “clamped” the quiescent steady-state value (Figure 8E, open triangle in the black trace). This failure was present already during the first few seconds of the simulation at BCL 300 ms (open diamond, in the grey trace).

Results shown in Figure 8E suggest that roughly half of the rate-dependent adaptation of APD comes from the short-term ionic mechanisms that operate in the timescale of seconds, whereas the long-term adaptation responsible for the other half of APD decrease takes minutes to develop. Furthermore, the longer pacing protocol results in a much steeper dependence of APD in the BCL range of [1600, 400] ms ( $-35\%$ ), compared to the shortening of APD ( $-27\%$ ) shown in Figure 8C.

Simulation results suggest that the mechanism that links AP shortening (Figure 8F) to  $\text{Na}^+$  accumulation is the  $\text{Na}^+/\text{K}^+$ -ATPase (NKA). The enhanced pumping function of NKA lead to a dramatic increase in the current ( $I_{\text{NKA}}$ ) (Figure 8G). Accordingly, this mechanism has been reported previously in human atrial fibers [42] and guinea pig ventricular myocytes [43]. To confirm that this feature of the myocyte model does not depend on the  $\text{Na}^+$  parameters of model variant, we simulated the same protocol with model variant vCa (no junctional  $\text{Na}^+$  compartment) and found that fast pacing resulted in a similar increase in  $I_{\text{NKA}}$  (data not shown).

### Rate-dependent changes in the NCX current

To evaluate the effect that  $\text{Na}^+$  accumulation due to fast pacing has on the  $\text{Ca}^{2+}$  dynamics via modulation of the NCX function, we simulated a previously used pacing protocol [44], in which the pacing frequency was increased in a stepwise manner from 1 to 2 Hz and further to 3 Hz. The results provide a general level validation for the rate dependence of  $\text{Ca}^{2+}$  dynamics of the model (Figure 9A) that correspond qualitatively to the measured force (Figure 9B).

To further study the role of NCX in the rate dependence of  $\text{Ca}^{2+}$  dynamics, we evaluated the role of the NCX as a secondary trigger of the CICR process. Figure 9E shows that whereas the  $\text{Ca}^{2+}$  influx via LTCC is decreased slightly (integral decreases by

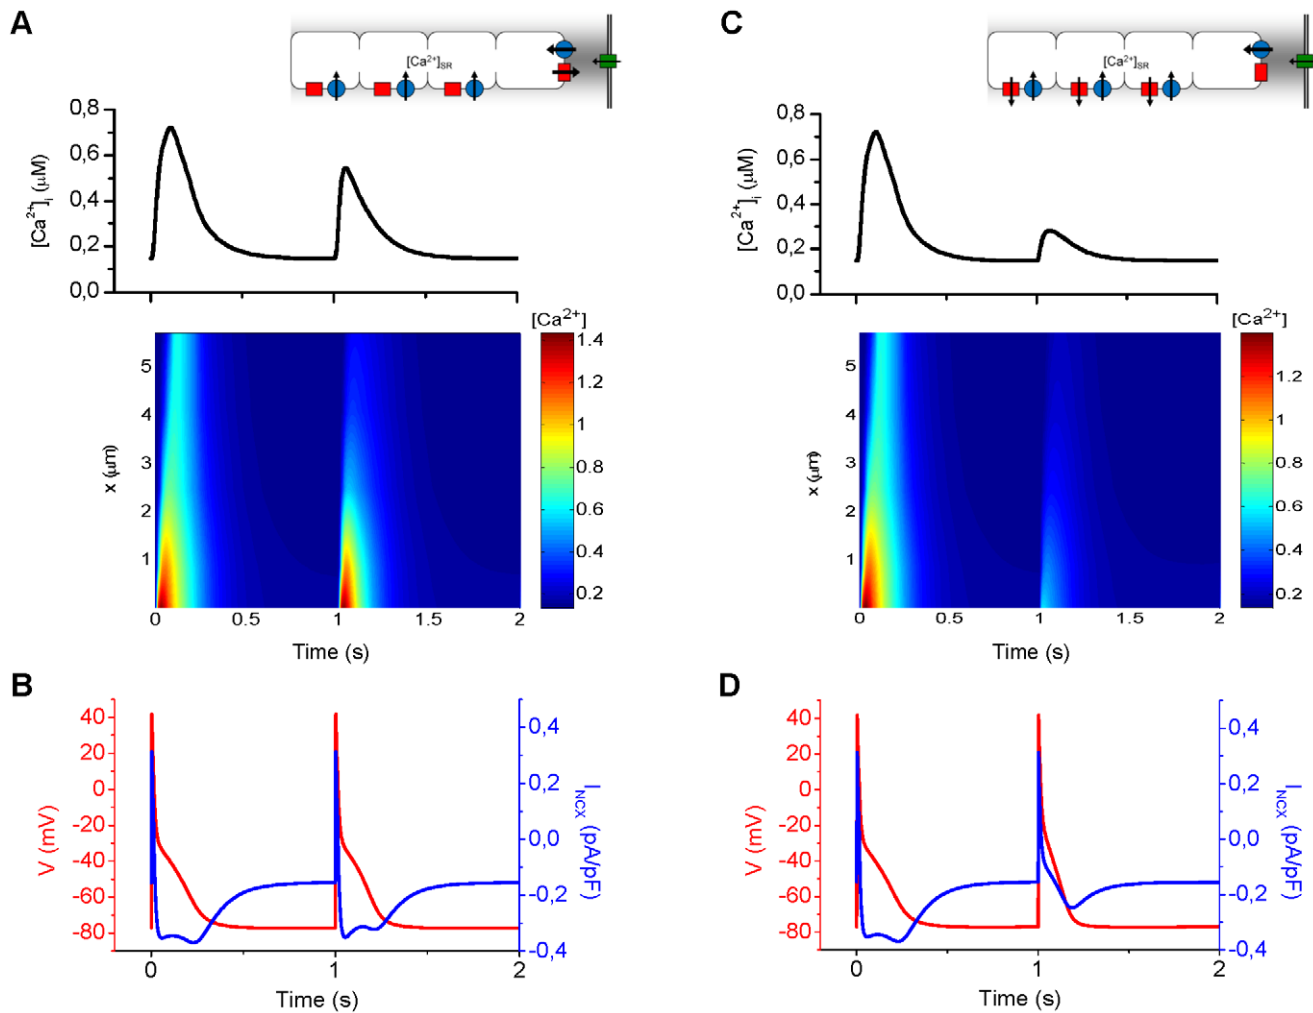

**Figure 5. Role of the junctional vs. bulk SR Ca<sup>2+</sup> release sites in the ECC.** (A) Inhibition of the release sites (at t = 1 s) in the bulk cytosol has only a small impact on the ECC. The amplitude of the global Ca<sup>2+</sup> transient is decreased by 31%. The Ca<sup>2+</sup> signal becomes relatively inhomogeneous and it is not carried at all to the center of the cell. (B) The abnormal Ca<sup>2+</sup> dynamics also affect the AP: APD<sub>90</sub> is shortened by 10%. Since there is less Ca<sup>2+</sup> to be extruded, the I<sub>NCX</sub> is reduced. (C) Inhibition of the junctional SR Ca<sup>2+</sup> release site (at t = 1 s) has a profound effect on the ECC. The amplitude of the global Ca<sup>2+</sup> transient is decreased by 58%. Without the junctional SR Ca<sup>2+</sup> release, the Ca<sup>2+</sup> influx via the L-type Ca<sup>2+</sup> channels is too weak to trigger the CICR at the first release site in the bulk cytosol. Thus, the inhibition of the junctional release results in a failure in the propagation of the Ca<sup>2+</sup> signal. (D) The APD<sub>90</sub> is shortened by 34%. Due to the lower [Ca<sup>2+</sup>]<sub>i</sub> in the junctional compartment, the depolarizing I<sub>NCX</sub> is not activated to the normal level.

doi:10.1371/journal.pcbi.1001067.g005

~14%) during fast pacing, the flux via reverse mode of NCX is increased considerably (integral increases over two-fold). However, since relative contribution of NCX is much smaller, we performed an additional simulation analysis to quantitate its role in rate-dependent modulation of Ca<sup>2+</sup> dynamics. In line with a previous study [45], blocking the reverse mode of the NCX delays the peak of [Ca<sup>2+</sup>]<sub>i</sub> by 1.8 ms (109.1 ms vs. 110.9 ms for control and block, respectively) when the pacing frequency is 1 Hz. This effect is more pronounced during fast pacing: the delay increases to 2.4 and 3.5 ms with 2 and 3 Hz, respectively. Thus, the results suggest that the rate-dependent modulation of NCX could mediate a shortening of the delay between the electrical excitation and the peak of Ca<sup>2+</sup> transient.

## Discussion

We have developed a mathematical model of the human atrial myocyte with a spatially detailed and atria-specific

description of intracellular [Ca<sup>2+</sup>]<sub>i</sub> dynamics. The presented results indicate that the model accurately replicates crucial experimental findings: instead of a homogenous Ca<sup>2+</sup> release, ECC is driven by a Ca<sup>2+</sup> wave that arises first in the periphery and then propagates to the cell center [3,7,8]. This novel model enabled a dissective analysis of the interrelations between [Ca<sup>2+</sup>]<sub>i</sub>, sarcolemmal ion currents, and SR Ca<sup>2+</sup> release. The results highlight the importance of the junctional SR Ca<sup>2+</sup> release sites in defining the interface between Ca<sup>2+</sup> and AP, whereas the non-junctional release sites are significant for the fire-diffuse-fire propagation of Ca<sup>2+</sup> diffusion. Furthermore, our analysis indicates that intracellular Ca<sup>2+</sup> dynamics are strongly linked to the AP morphology via modulation of NCX current, thus also affecting the refractoriness and excitability. The presented simulations also suggest that one of the main mechanisms of AP rate dependence is the accumulation of [Na<sup>+</sup>]<sub>i</sub> that modulates the function of NKA during continued fast pacing.



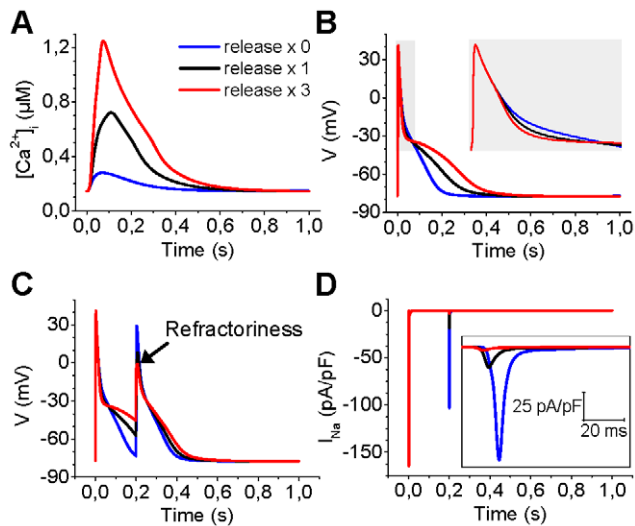

**Figure 6. Effect of SR  $\text{Ca}^{2+}$  release on APD and refractoriness.** (A) Modulation of SR  $\text{Ca}^{2+}$  release (total block, blue; normal, black; triple release, red) has a dramatic effect on the mean cytosolic  $\text{Ca}^{2+}$  transient. (B) Increased release promotes slower initial (inset: zoomed to the first 75 ms) and faster late repolarization of the membrane voltage, whereas blocking the release generates opposite changes. (C) The SR  $\text{Ca}^{2+}$  release is an important factor for the refractoriness of the cell. Increased SR  $\text{Ca}^{2+}$  release can block the second AP (interval 200 ms). Note that the second peak that is seen in the AP trace (red line) is caused by the stimulus current, i.e., there is no actual second AP. (D) Refractoriness is caused by blocking the  $I_{\text{Na}}$ , which is shown more clearly in the inset. doi:10.1371/journal.pcbi.1001067.g006

### Principal characteristics of the model and relevance to previous *in silico* studies

It is well known that in the human atria the cellular AP shape varies depending, for example, on gender, age and personal ongoing medication plan. In addition to the physiological variation, studies using human tissue samples are always affected by the parallel pathophysiology of the patients who are undergoing surgery due to some other cardiac malfunction. Experimentally, the morphology of the human atrial AP ranges from a triangular AP shape with no sustained plateau to a long AP with a spike-and-dome shape [46,47,48]. The AP heterogeneity has been shown to correlate tightly with the relative expression levels of ion channels in different regions of the atria in an experimental canine model [49] and in human patients [50]. In the model presented here, the AP characteristics (resting membrane potential, upstroke velocity, amplitude and duration) emerging from an accurate description of individual ion currents are well within the range of experimental data reported in the literature.

During the last decade, mathematical modeling has become an established complement to experimental work in attempts to elucidate the ionic mechanisms that underlie the electrophysiology of cardiac myocytes [9]. In the case of human atrial myocyte models, the platform was established by the individual works of Nygren *et al.* [10] and Courtemanche *et al.* [31]. The usability of these comprehensive frameworks has been established, e.g. in consecutive *in silico* studies of AP morphology [37,51] and atrial fibrillation [52,53,54]. While these models provide a detailed description of the transmembrane ion currents, very little emphasis has been placed on the accurate description of the spatiotemporal properties of intracellular  $\text{Ca}^{2+}$ . Experimental findings indicate that there are substantial spatiotemporal differences in the properties of the atrial and ventricular  $\text{Ca}^{2+}$  transients [3,4], thus

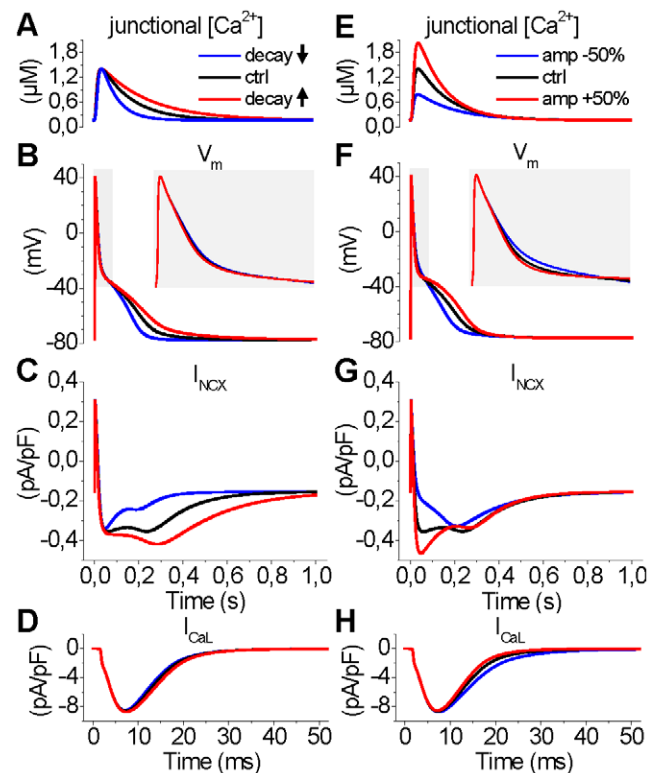

**Figure 7. Effect of the amplitude and decay of the junctional  $\text{Ca}^{2+}$  transient on APD.** (A) The junctional  $\text{Ca}^{2+}$  transient was clamped to three different decay modes (slowed decay, blue; normal decay, black; accelerated decay, red) with analytical functions. (B) Modulating the decay of the junctional  $\text{Ca}^{2+}$  transient has a pronounced effect on the APD (inset: zoomed to the first 75 ms). (C) The modulatory effect is mainly mediated by the changes in the late phase of  $I_{\text{NCX}}$ . The late current increases/decreases with faster/slower decay of the  $\text{Ca}^{2+}$  transient, respectively. (D) The modulation of  $\text{Ca}^{2+}$  transient decay has no significant effect on the inactivation the  $I_{\text{CaL}}$ . (E) To mimic the modulation of RyR (decreased release, blue; normal release, black; increased release, red), the junctional  $\text{Ca}^{2+}$  transient was clamped to three different amplitude modes (inset). (F) Increasing the amplitude of the junctional  $\text{Ca}^{2+}$  transient accelerates the early repolarization and decelerates the late repolarization of the AP (inset: zoomed to the first 75 ms), while a decreased amplitude has an opposite effect. (G) The modulatory effect of the  $\text{Ca}^{2+}$  transient amplitude is mainly mediated by the changes in the initial phase of  $I_{\text{NCX}}$ . The late current increases with faster and decreases with slower decay of the  $\text{Ca}^{2+}$  transient. (H) The modulation of  $\text{Ca}^{2+}$  transient amplitude also affects the inactivation the  $I_{\text{CaL}}$ . doi:10.1371/journal.pcbi.1001067.g007

we have developed a novel model that considers the atrial-specific properties of  $\text{Ca}^{2+}$  signaling.

### $\text{Ca}^{2+}$ dynamics of the model

In contrast to the virtually uniform  $\text{Ca}^{2+}$  release in ventricular myocytes [6], it is characteristic for atrial myocytes that the  $\text{Ca}^{2+}$  wave, initiated by the CICR mechanism, arises first in the periphery and then propagates to the cell center [3,7,8]. Consequently, the delay between the peripheral and central  $\text{Ca}^{2+}$  release in atrial myocytes yields a biphasic increment during the upstroke of the  $\text{Ca}^{2+}$  transient [7]; a phenomenon that is reproduced in our model with accurate spatiotemporal parameters. This delay can be decreased by inotropic interventions that promote increased SR  $\text{Ca}^{2+}$  content, and consequently enhanced SR  $\text{Ca}^{2+}$  release; thus, it establishes a mechanism through which

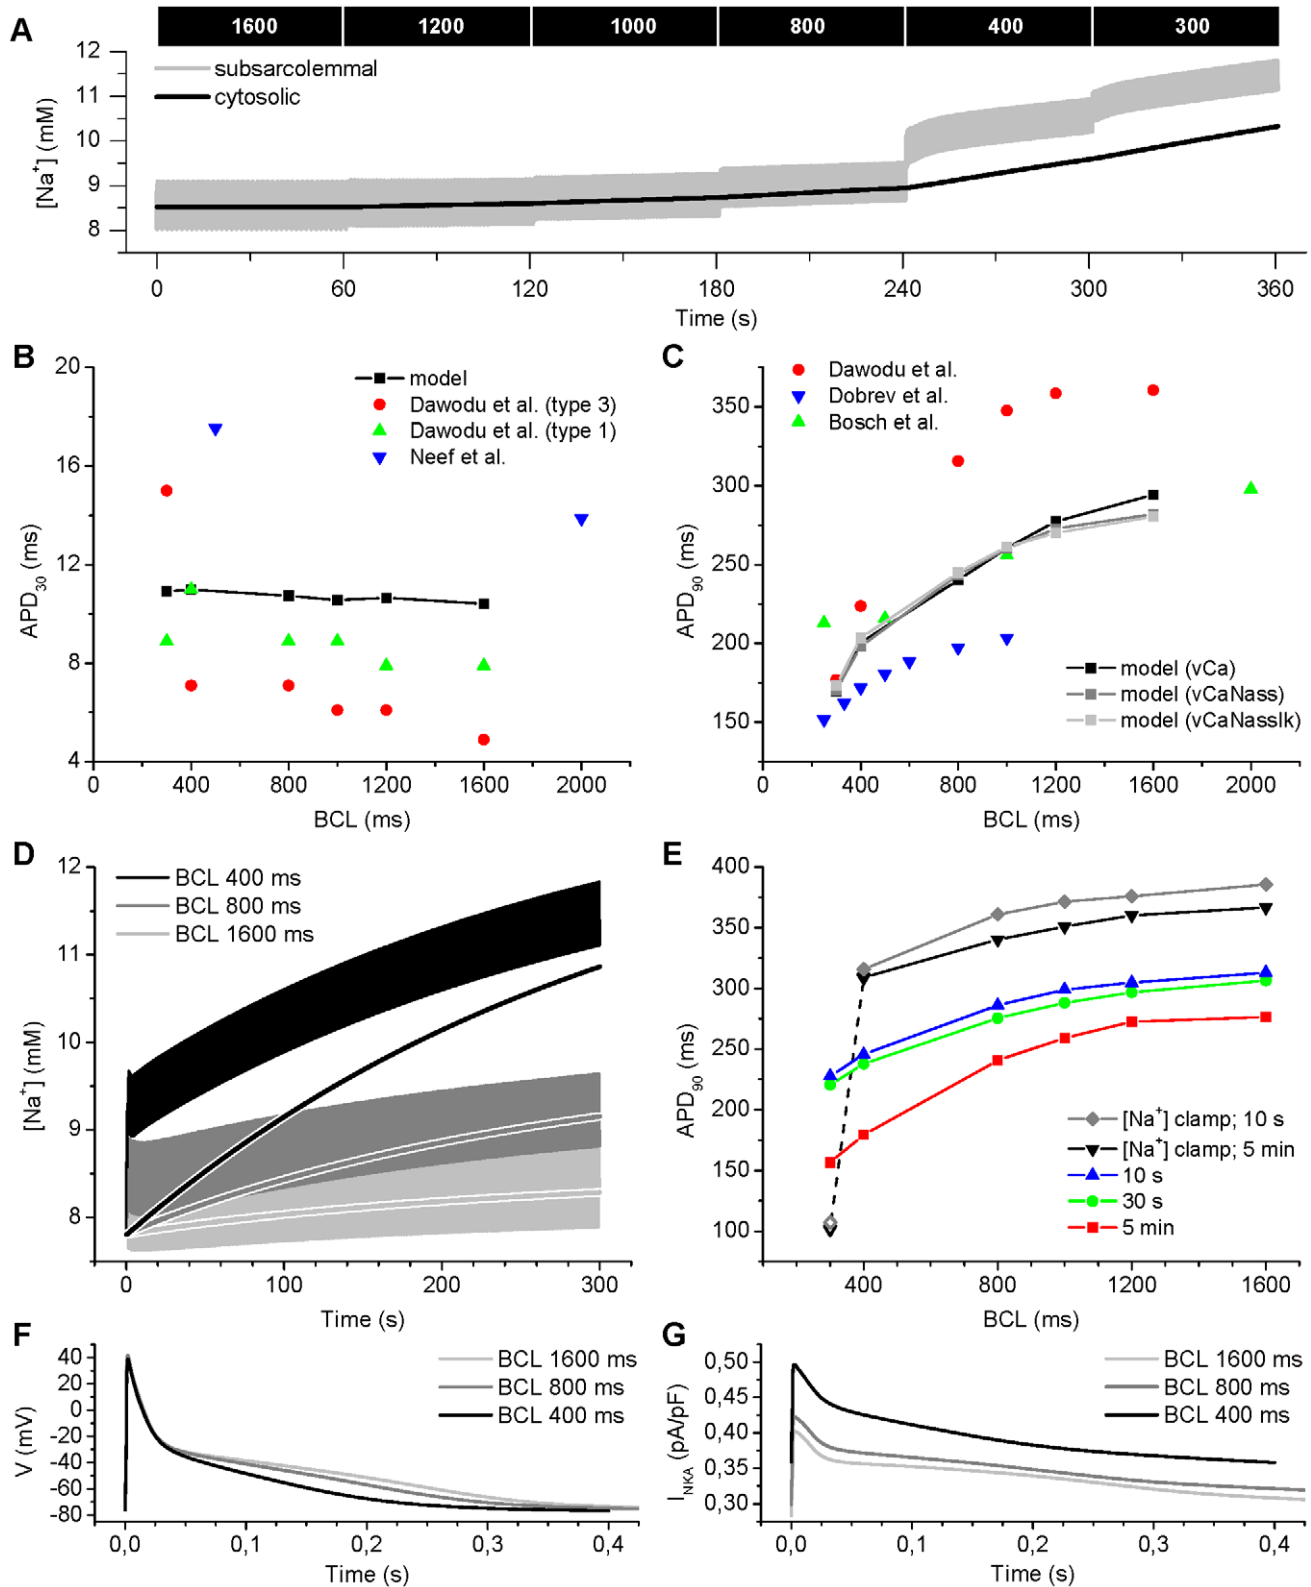

**Figure 8. Role of Na<sup>+</sup> accumulation in the rate dependence of the AP.** The myocyte was paced as previously [38] with a stepwise reduction in BCL, and corresponding AP characteristics were defined for each BCL. (A) Shortening of the BCL increases both the subsarcolemmal and cytosolic [Na<sup>+</sup>], especially at BCLs 400 ms and 300 ms. (B) The values of APD<sub>30</sub> calculated from simulations are compared to those reported by Dawodu *et al.* [38], and Neef *et al.* [70]. (C) The steep dependence of APD<sub>90</sub> on the BCL reported by Dawodu *et al.* [38], Bosch *et al.* [72] and Dobrev & Ravens [73] is reproduced by the model. (D) Continued fast pacing starting from a quiescent steady-state results in a dramatic accumulation of intracellular Na<sup>+</sup>. (E) APD adaptation in control situation conditions and [Na<sup>+</sup>]<sub>i</sub> “clamped” to the quiescent steady-state value. (F) AP shape at BCLs 1600, 800 and 400 ms after 5 minutes of pacing starting from a quiescent steady-state. (G) Accumulation of Na<sup>+</sup> due to fast pacing, continued for 5 minutes, increases Na<sup>+</sup>/K<sup>+</sup>-ATPase current (I<sub>NKA</sub>) substantially.  
doi:10.1371/journal.pcbi.1001067.g008

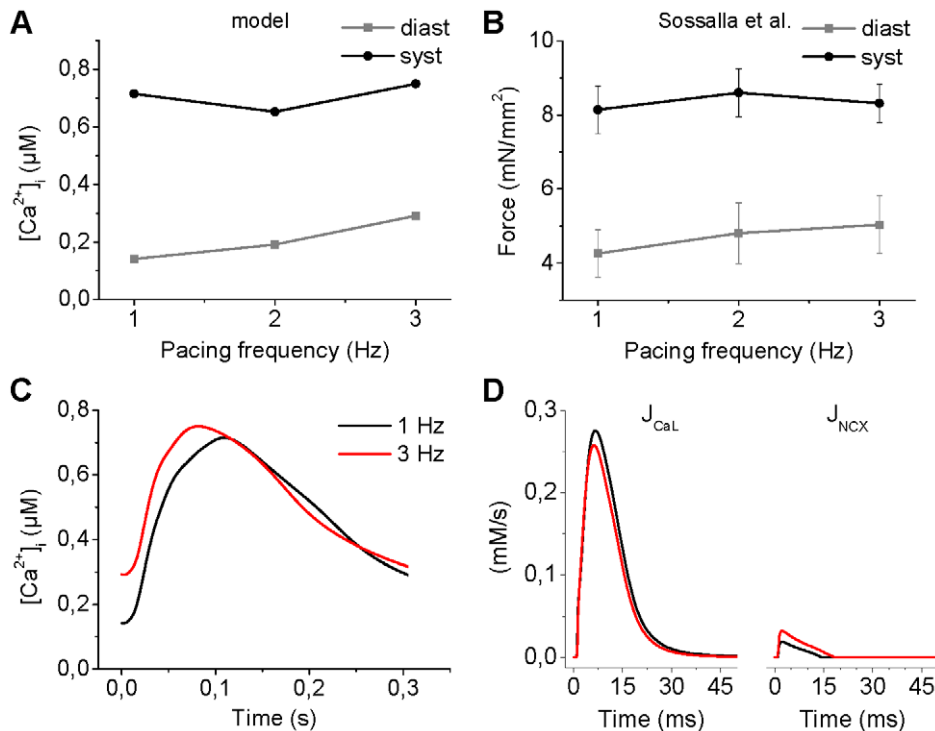

**Figure 9. Rate dependence of Ca<sup>2+</sup> dynamics.** The myocyte was paced as previously [44] with a pacing frequencies [1,2,3] Hz. Each pacing frequency was applied for 5 minutes in a continuous stimulus train. Rate dependence of Ca<sup>2+</sup> dynamics (A) matches qualitatively to the force-frequency relation (B) reported by Sossalla et al. [44]. (C) Changes of Ca<sup>2+</sup> transient dynamics in response to fast pacing. (D) Ca<sup>2+</sup> influx via the reverse mode of the NCX (right panel) increases substantially during fast pacing, whereas the influx via the LTCC is decreased slightly (left panel). doi:10.1371/journal.pcbi.1001067.g009

the interval between the electrical excitation and the peak of Ca<sup>2+</sup> transient can be modulated.

Our results highlight the crucial role of the junctional SR in mediating the CICR, while the inhibition of non-junctional Ca<sup>2+</sup> release sites causes only an attenuation of the Ca<sup>2+</sup> signal during fire-diffuse-fire propagation. Furthermore, junctional SR Ca<sup>2+</sup> release sites appear to define the interface between Ca<sup>2+</sup> and AP, i.e., decreasing the junctional Ca<sup>2+</sup> release shortens the AP substantially. These findings are in line with the previously suggested role of the non-junctional SR as an inotropic release reserve that can be recruited when greater contractility is required [13].

Cumulative evidence suggests that changes in the [Ca<sup>2+</sup>]<sub>i</sub> homeostasis may initiate electrical remodeling during atrial fibrillation, which is characterized by a marked shortening of the action potential plateau phase [55,56,57]. In future studies, the presented model, which is based on an atrial-specific description of Ca<sup>2+</sup> signaling, has thus great potential in elucidating the function of the remodeled cells with altered Ca<sup>2+</sup> homeostasis and SL ion currents.

### Impact of Ca<sup>2+</sup> transient on AP morphology and cellular excitability

The tight coupling of SL ion currents, which underlie the AP shape, and the [Ca<sup>2+</sup>]<sub>i</sub> has been well established in experimental setups of both ventricular [33,58,59] and atrial myocytes [48], as well as in computational studies [36,60]. Our results suggest that both amplitude and decay modulation of the Ca<sup>2+</sup> transient produce significant changes to the APD compared to the control situation. Changes in [Ca<sup>2+</sup>]<sub>i</sub> in the vicinity of the SL affects both I<sub>NCX</sub> and I<sub>CaL</sub>. However, while both increased amplitude and

decelerated decay of the Ca<sup>2+</sup> transient enhance the inward I<sub>NCX</sub>, the inactivation of I<sub>CaL</sub> is affected only by the former. These findings indicate that in human atrial myocytes the NCX is more important than the LTCC in linking the amount of Ca<sup>2+</sup> released from the SR to changes in the APD. This scheme also concurs with a previously reported role of NCX as the main mediator of the inotropic effect of AP prolongation in canine atrial myocytes [61]. Understanding the role of this mechanism is of great importance because it not only links inotropic interventions (increased amplitude of the Ca<sup>2+</sup> transient) but also situations such as hypothyroidism (slowed decay of the Ca<sup>2+</sup> transient) to APD modulations.

When the effects of amplitude and decay modulation of the Ca<sup>2+</sup> transient are combined to a strongly modulated physiological frameset of blocked or increased SR Ca<sup>2+</sup> release, the resulting changes in AP morphology are even more pronounced. That is, decreasing the release decelerates the early repolarization and accelerates the late repolarization of the membrane voltage, whereas increased SR Ca<sup>2+</sup> release promotes a faster early repolarization and a slower late repolarization of the AP. Most interestingly, the increased SR Ca<sup>2+</sup> release enhances the refractoriness of the AP. That is, the decelerated repolarization of the AP (due to increased I<sub>NCX</sub>) slows down the recovery from inactivation of the sodium current and thus a premature electrical stimulus is unable to trigger a second AP.

### Rate-dependent modulation of action potential

The primary physiological context, in which the duration of the AP is modulated, relates to changes in heart rate [62]. Numerous parameters of the *in situ* heart are affected simultaneously in that dynamic process, but in single cell preparations the situation is

significantly simpler. In ventricular myocytes, one of the main mechanisms that has been shown to underlie the rate dependence of the AP is the accumulation of cytosolic  $\text{Na}^+$  during fast pacing [33,34,35,36]. That is, as the pacing rate increases, the  $\text{Na}^+$  influx per unit time is increased. Since this change is not fully compensated with increased efflux,  $[\text{Na}^+]_i$  increases with continued fast pacing.

As previously demonstrated in ventricular myocytes [35], this mechanism emerges from the interplay of NKA and NCX. If only NKA or NCX senses the accumulated  $[\text{Na}^+]_i$  in response to continued fast pacing, the APD is decreased less compared to the normal situation, in which both of them sense an increased  $[\text{Na}^+]_i$ . A similar phenomenon is apparent in our atrial model: the mere increase in pacing frequency (or reduction in BCL) does not produce a maximal shortening of the AP. Rather, the increase of  $[\text{Na}^+]_i$  and the consequent change in the NKA function, caused by the continued high frequency pacing, promote a substantial further decrease of APD. Furthermore, the results indicate that the other ionic determinants of APD, emerging from the rate dependence of  $I_{\text{sus}}$  [37] and  $\text{Ca}^{2+}$  dynamics, are effective already within a shorter time-scale ( $\sim 10$  s) of adaptation compared to that of  $\text{Na}^+$  ( $\sim$ minutes). Thus, our findings underline the importance of considering the effect of  $\text{Na}^+$  accumulation in both *in vitro* and *in silico* studies of AP rate dependence when results obtained with different protocols are interpreted or compared.

In myocytes with long AP, the increase of  $\text{Ca}^{2+}$  transient shortens the AP (via inactivation  $I_{\text{CaL}}$ ). Interestingly, our simulation results indicate that, in this respect, the human atrial myocytes behave similar to animal with short AP. That is, increased  $\text{Ca}^{2+}$  transient amplitude (due to e.g. enhanced SR  $\text{Ca}^{2+}$  release) promotes an inward  $I_{\text{NCX}}$ , thus lengthening the AP.

### $\text{Ca}^{2+}$ entry through the NCX and its role in CICR

The role of the NCX as a trigger of SR  $\text{Ca}^{2+}$  release has been studied extensively in ventricular myocytes during recent years; the findings, however, are controversial [60]. While some results indicate that  $\text{Ca}^{2+}$  entry via the reverse mode of NCX is significant in physiological conditions [63,64], other studies suggest it to be important only in pathological situations [1,65].

Our simulation results suggest that in atrial myocytes the contribution of NCX to the  $\text{Ca}^{2+}$  influx is increasingly significant at higher pacing rates, even though the bulk of the flux goes via the LTCC. However, when the temporal role of these two mechanisms is compared, it is apparent that during the first few milliseconds of the CICR process the NCX contributes rather equally to the  $\text{Ca}^{2+}$  influx. Accordingly, the acute inhibition of the reverse mode of NCX delays the peak of  $[\text{Ca}^{2+}]_i$  by a few milliseconds, depending on the pacing rate. These findings are in line with the reported delay of the  $\text{Ca}^{2+}$  transient if the  $\text{Ca}^{2+}$  entry via the NCX is inhibited in ventricular myocytes [45]. Our results thus indicate that the NCX could have an important role in accelerating the rise of  $[\text{Ca}^{2+}]_i$  with increasing heart rate, even though LTCC is the primary trigger of CICR, as suggested previously [66]. Hence, the modulation of the NCX could promote a rate-dependent reduction of the electro-mechanical interval in the development of contractile force. The *in vivo* significance of the delay modulation by the NCX presents an interesting question for future simulation studies in tissue and/or whole-atria models.

### Potential limitations

Variability of experimental results imposes a fundamental challenge for modeling studies that utilize data measured from

isolated human atrial tissues or cells. It would thus be an irrelevant and futile effort to try to fit the electrophysiological characteristics of the model perfectly to one single set of *in vitro* data. Instead, it is more essential that the simulation results agree qualitatively and semiquantitatively with the majority of the measured results, which has been established for the AP morphology in our model. There is a further challenge for validation of the  $\text{Ca}^{2+}$  dynamics due to incomplete experimental data. To compensate for this, we have also compared the model behavior to ventricular data and measurements obtained with atrial animal models.

The developed RyR module of the myocyte model is an approximate description of macroscopic SR  $\text{Ca}^{2+}$  release, sharing the general limitations ‘common pool’ models. Thus, the justification for most of the chosen parameter values cannot be derived directly from the biophysical properties of RyR channels [67,68]. Instead, the *ad hoc* parameter values of the RyR modules are based on indirect fitting: the dynamics of intracellular  $\text{Ca}^{2+}$  were adjusted to be in line with macroscopic experimental observations [3,7,8]. The simple structure makes the RyR module computationally efficient, while still being capable of reproducing essential features of RyR  $\text{Ca}^{2+}$  release characterize the emergent properties of atrial  $\text{Ca}^{2+}$  dynamics: biphasicity of the increasing  $\text{Ca}^{2+}$  concentration during the  $\text{Ca}^{2+}$  transient, and the relative contribution of SL and SR  $\text{Ca}^{2+}$  fluxes to the  $\text{Ca}^{2+}$  transient. A more complex RyR module might be needed in future studies if the simulations are run beyond the conditions that were investigated in this study.

Although our model can reproduce rather accurately the rate-dependent changes in ion dynamics, it should be noted that the description of the underlying mechanisms is by no means exhaustive. For example, one potential regulatory pathway is the  $\text{Ca}^{2+}$ /calmodulin-dependent protein kinase (CaMK)II that has been studied extensively in ventricular myocytes [69]. Recent findings indicate that CaMKII could, for example, have an important role in the regulation of RyR [70] in atrial myocytes. As more experimental data become available, the effects of CaMKII on its phosphorylation targets should be considered in future modeling studies.

We have chosen to use Hodgkin-Huxley formalism for the ion currents. We acknowledge that Markovian models would allow for a more detailed description of the complex kinetics of processes (activation, deactivation, inactivation, and recovery from inactivation) that the channels exhibit. However, it can be very difficult to meet the information requirements for defining the transitional rate constants [71]. Furthermore, Markovian models can be computationally expensive compared to Hodgkin-Huxley formalism [71].

### Conclusion

We conclude that the novel myocyte model provides significant insight into the excitation and ion dynamics of human atria. Our results underline the tight coupling of AP morphology to SR  $\text{Ca}^{2+}$  release and intracellular  $\text{Na}^+$  that are subject to strong modulation under physiological conditions. Furthermore, with a physiologically accurate description of intracellular  $\text{Ca}^{2+}$  dynamics the model is a potential tool, for example, in the elucidation of mechanisms that link changes in  $\text{Ca}^{2+}$  homeostasis to pathophysiological conditions. Thus, it offers attractive possibilities to study the electrical remodeling during atrial fibrillation, and to find potential targets that affect the refractoriness of the AP. Finally, as the computational cost of the model is low, it is also a feasible component for multi-scale models of tissue and/or heart.

## Supporting Information

**Figure S1** The L-type  $\text{Ca}^{2+}$  current ( $I_{\text{CaL}}$ ) characteristics. (A) The time-constant for gate  $f_1$  was fitted to experimental data [1]. In contrast to the original formulation of Nygren et al. [2] (black line), the time-constant was adjusted to have larger values in the membrane voltage range of  $-40$  and  $-10$  mV (blue line); an approach that has been used previously [3] (red line). (B) The steady-state curve for the  $\text{Ca}^{2+}$  dependent inactivation gate is shown as a function of  $[\text{Ca}^{2+}]$  in the junctional subspace. As the lower panel shows, this formulation reproduces qualitatively the result that blocking of SR  $\text{Ca}^{2+}$  release decreases the rate of LTCC inactivation significantly in human atrial myocytes [5]. (C) The traces show the  $I_{\text{CaL}}$  that was recorded in voltage clamp simulation; holding potential =  $-80$  mV.  
Found at: doi:10.1371/journal.pcbi.1001067.s001 (0.14 MB TIF)

**Figure S2** Steady-state activation and time-constant of  $I_f$ . Experimental conditions were replicated from [12]. The current traces of  $I_f$  were determined by application of hyperpolarizing voltage steps from  $-40$  to  $-140$  mV in 10 mV steps, the holding potential was  $-40$  mV. The  $I_f$  model was fitted to the left atrium wall data from [12].  
Found at: doi:10.1371/journal.pcbi.1001067.s002 (0.07 MB TIF)

**Figure S3** The principal outputs of the myocyte model at 1 Hz pacing. (A) The model reproduces an AP that is characteristic for human atrial myocytes: a large initial peak with a narrow early plateau is followed by a late, low amplitude, plateau phase; a so-called triangular shape. (B) and (C) The major depolarizing currents in the initial phase of the AP are the  $I_{\text{Na}}$  and  $I_{\text{CaL}}$ . (D) The  $I_{\text{to}}$  (black line) and  $I_{\text{sus}}$  (grey line) generate large repolarizing currents in the beginning of the AP. (E) The late repolarization is carried mostly by  $I_{\text{K1}}$  (F). As demonstrated by the time courses of  $I_f$  (black solid line),  $I_{\text{Ks}}$  (black dashed line), and  $I_{\text{Kr}}$  (grey line), they

contribute very little to the AP, compared to  $I_{\text{to}}$  and  $I_{\text{sus}}$ . (G) During the late phase of the AP, the  $I_{\text{NCX}}$  (grey line) generates a significant depolarizing current, while the amplitude of  $I_{\text{PMCA}}$  (black line) is much smaller.

Found at: doi:10.1371/journal.pcbi.1001067.s003 (0.17 MB TIF)

**Table S1** Modified parameter values of the previously published model components.  
Found at: doi:10.1371/journal.pcbi.1001067.s004 (0.01 MB PDF)

**Table S2** Parameters of the novel RyR model.  
Found at: doi:10.1371/journal.pcbi.1001067.s005 (0.01 MB PDF)

**Table S3** Comparison of AP characteristics of the developed model (vCa) and the two extended variants (vCaNass and vCaNassIk) to experiments.  
Found at: doi:10.1371/journal.pcbi.1001067.s006 (0.01 MB PDF)

**Table S4** Initial values for the differential variables at 1 Hz pacing steady-state.  
Found at: doi:10.1371/journal.pcbi.1001067.s007 (0.01 MB PDF)

**Text S1** Model implementation.  
Found at: doi:10.1371/journal.pcbi.1001067.s008 (0.16 MB PDF)

## Acknowledgments

We thank S.L. Hämmen for valuable comments and careful reading of the manuscript.

## Author Contributions

Conceived and designed the experiments: JTK TK PT. Performed the experiments: JTK TK. Analyzed the data: JTK TK PT. Contributed reagents/materials/analysis tools: JTK TK PT. Wrote the paper: JTK TK PT.

## References

- Bers DM (2001) Excitation-contraction coupling and cardiac contractile force. Dordrecht ; Boston: Kluwer Academic Publishers. xxiv, 427 p.
- Fabiato A (1983) Calcium-induced release of calcium from the cardiac sarcoplasmic reticulum. *Am J Physiol Cell Physiol* 245: C1–14.
- Tanaami T, Ishida H, Seguchi H, Hirota Y, Kadono T, et al. (2005) Difference in propagation of  $\text{Ca}^{2+}$  release in atrial and ventricular myocytes. *Jpn J Physiol* 55: 81–91.
- Walden AP, Dibb KM, Trafford AW (2009) Differences in intracellular calcium homeostasis between atrial and ventricular myocytes. *J Mol Cell Cardiol* 46: 463–473.
- Brette F, Orchard C (2003) T-tubule function in mammalian cardiac myocytes. *Circ Res* 92: 1182–1192.
- Cheng H, Cannell MB, Lederer WJ (1994) Propagation of Excitation-Contraction Coupling into Ventricular Myocytes. *Pflügers Archiv-European Journal of Physiology* 428: 415–417.
- Hatem SN, Benardeau A, RuckerMartin C, Marty I, deChamisso P, et al. (1997) Different compartments of sarcoplasmic reticulum participate in the excitation-contraction coupling process in human atrial myocytes. *Circ Res* 80: 345–353.
- Huser J, Lipsius SL, Blatter LA (1996) Calcium gradients during excitation-contraction coupling in cat atrial myocytes. *J Physiol* 494: 641–651.
- Fink M, Niederer SA, Cherry EM, Fenton FH, Koivumäki JT, et al. (2010) Cardiac cell modelling: Observations from the heart of the cardiac physiome project. *Prog Biophys Mol Biol* 588: 2643–2655.
- Nygren A, Fiset C, Firek L, Clark JW, Lindblad DS, et al. (1998) Mathematical model of an adult human atrial cell - The role of  $\text{K}^+$  currents in repolarization. *Circ Res* 82: 63–81.
- Michailova A, DelPrincipe F, Egger M, Niggli E (2002) Spatiotemporal features of  $\text{Ca}^{2+}$  buffering and diffusion in atrial cardiac myocytes with inhibited sarcoplasmic reticulum. *Biophys J* 83: 3134–3151.
- Kockskamper J, Sheehan KA, Bare DJ, Lipsius SL, Mignery GA, et al. (2001) Activation and propagation of  $\text{Ca}^{2+}$  release during excitation-contraction coupling in atrial myocytes. *Biophys J* 81: 2590–2605.
- Mackenzie L, Roderick HL, Berridge MJ, Conway SJ, Bootman MD (2004) The spatial pattern of atrial cardiomyocyte calcium signalling modulates contraction. *J Cell Sci* 117: 6327–6337.
- Frank M, Albrecht I, Sleator WW, Robinson RB (1975) Stereological measurements of atrial ultrastructures in the guinea-pig. *Experientia* 31: 578–580.
- Wagner J, Keizer J (1994) Effects of Rapid Buffers on  $\text{Ca}^{2+}$  Diffusion and  $\text{Ca}^{2+}$  Oscillations. *Biophys J* 67: 447–456.
- Hove-Madsen L, Llach A, Bayes-Genis A, Roura S, Font ER, et al. (2004) Atrial fibrillation is associated with increased spontaneous calcium release from the sarcoplasmic reticulum in human atrial myocytes. *Circulation* 110: 1358–1363.
- Shannon TR, Wang F, Puglisi J, Weber C, Bers DM (2004) A mathematical treatment of integrated Ca dynamics within the ventricular myocyte. *Biophys J* 87: 3351–3371.
- Swietach P, Spitzer KW, Vaughan-Jones RD (2008)  $\text{Ca}^{2+}$ -Mobility in the Sarcoplasmic Reticulum of Ventricular Myocytes Is Low. *Biophys J* 95: 1412–1427.
- Koivumäki JT, Takalo J, Korhonen T, Tavi P, Weckström M (2009) Modelling sarcoplasmic reticulum calcium ATPase and its regulation in cardiac myocytes. *Philos Transact A Math Phys Eng Sci* 367: 2181–2202.
- Gyorke I, Gyorke S (1998) Regulation of the cardiac ryanodine receptor channel by luminal  $\text{Ca}^{2+}$  involves luminal  $\text{Ca}^{2+}$  sensing sites. *Biophys J* 75: 2801–2810.
- Gyorke S, Fill M (1993) Ryanodine Receptor Adaptation - Control Mechanism of  $\text{Ca}^{2+}$ -Induced  $\text{Ca}^{2+}$  Release in Heart. *Science* 260: 807–809.
- Zorn-Paully K, Schaffer P, Pelzmann B, Lang P, Machler H, et al. (2004) If in left human atrium: a potential contributor to atrial ectopy. *Cardiovasc Res* 64: 250–259.
- Coutu P, Chartier D, Nattel S (2006) Comparison of  $\text{Ca}^{2+}$ -handling properties of canine pulmonary vein and left atrial cardiomyocytes. *Am J Physiol Heart Circ Physiol* 291: H2290–2300.
- Kockskamper J, Zima AV, Blatter LA (2005) Modulation of sarcoplasmic reticulum  $\text{Ca}^{2+}$  release by glycolysis in cat atrial myocytes. *J Physiol* 564: 697–714.
- Maier LS, Barckhausen P, Weisser J, Aleksic I, Baryalei M, et al. (2000)  $\text{Ca}^{2+}$  handling in isolated human atrial myocardium. *Am J Physiol Heart Circ Physiol* 279: H952–H958.
- Piacentino V, Weber CR, Chen XW, Weisser-Thomas J, Margulies KB, et al. (2003) Cellular basis of abnormal calcium transients of failing human ventricular myocytes. *Circ Res* 92: 651–658.

27. Brixius K, Pietsch M, Hoischen S, MullerEhmsen J, Schwinger RHG (1997) Effect of inotropic interventions on contraction and  $\text{Ca}^{2+}$  transients in the human heart. *J Appl Physiol* 83: 652–660.
28. Bootman MD, Higazi DR, Coombes S, Roderick HL (2006) Calcium signalling during excitation-contraction coupling in mammalian atrial myocytes. *J Cell Sci* 119: 3915–3925.
29. Yue LX, Feng JL, Gaspo R, Li GR, Wang ZG, et al. (1997) Ionic remodeling underlying action potential changes in a canine model of atrial fibrillation. *Circ Res* 81: 512–525.
30. Daoud EG, Knight BP, Weiss R, Bahu M, Paladino W, et al. (1997) Effect of verapamil and procainamide on atrial fibrillation-induced electrical remodeling in humans. *Circulation* 96: 1542–1550.
31. Courtemanche M, Ramirez RJ, Nattel S (1998) Ionic mechanisms underlying human atrial action potential properties: insights from a mathematical model. *Am J Physiol Heart Circ Physiol* 44: H301–H321.
32. Ramirez RJ, Nattel S, Courtemanche M (2000) Mathematical analysis of canine atrial action potentials: rate, regional factors, and electrical remodeling. *Am J Physiol Heart Circ Physiol* 279: H1767–1785.
33. Weber CR, Piacentino V, Ginsburg KS, Houser SR, Bers DM (2002)  $\text{Na}^+$ - $\text{Ca}^{2+}$  exchange current and submembrane  $[\text{Ca}^{2+}]_i$  during the cardiac action potential. *Circ Res* 90: 182–189.
34. Verdonck F, Mubagwa K, Sipido KR (2004)  $[\text{Na}^+]_i$  in the subsarcolemmal 'fuzzy' space and modulation of  $[\text{Ca}^{2+}]_i$  and contraction in cardiac myocytes. *Cell Calcium* 35: 603–612.
35. Grandi E, Pasqualini FS, Puglisi JL, Bers DM (2009) A Novel Computational Model of the Human Ventricular Action Potential and Ca transient. *Biophys J* 96: 664a–665a.
36. Han CL, Tavi P, Weckstrom M (2002) Modulation of action potential by  $[\text{Ca}^{2+}]_i$  in modeled rat atrial and guinea pig ventricular myocytes. *Am J Physiol Heart Circ Physiol* 282: H1047–H1054.
37. Maleckar MM, Greenstein JL, Giles WR, Trayanova NA (2009)  $\text{K}^+$  current changes account for the rate dependence of the action potential in the human atrial myocyte. *Am J Physiol Heart Circ Physiol* 297: H1398–1410.
38. Dawodu AA, Monti F, Iwashiro K, Schiariti M, Chiavarelli R, et al. (1996) The shape of human atrial action potential accounts for different frequency-related changes in vitro. *Int J Cardiol* 54: 237–249.
39. Boutjdir M, Leheuzey JY, Lavergne T, Chauvaud S, Guize L, et al. (1986) Inhomogeneity of Cellular Refractoriness in Human Atrium - Factor of Arrhythmia? *Pacing Clin Electrophysiol* 9: 1095–1100.
40. Cherry EM, Hastings HM, Evans SJ (2008) Dynamics of human atrial cell models: Restitution, memory, and intracellular calcium dynamics in single cells. *Prog Biophys Mol Biol* 98: 24–37.
41. Wang Z, Pelletier L, Talajic M, Nattel S (1990) Effects of flecainide and quinidine on human atrial action potentials. Role of rate-dependence and comparison with guinea pig, rabbit, and dog tissues. *Circulation* 82: 274–283.
42. Hordof A, Spotnitz A, Mary-Rabine L, Edie R, Rosen M (1978) The cellular electrophysiologic effects of digitalis on human atrial fibers. *Circulation* 57: 223–229.
43. Rocchetti M, Besana A, Mostacciolo G, Ferrari P, Micheletti R, et al. (2003) Diverse toxicity associated with cardiac  $\text{Na}^+/\text{K}^+$  pump inhibition: Evaluation of electrophysiological mechanisms. *J Pharmacol Exp Ther* 305: 765–771.
44. Sossalla S, Kallmeyer B, Wagner S, Mazur M, Maurer U, et al. (2010) Altered  $\text{Na}^+$  currents in atrial fibrillation effects of ranolazine on arrhythmias and contractility in human atrial myocardium. *J Am Coll Cardiol* 55: 2330–2342.
45. Lines GT, Sande JB, Louch WE, Mork HK, Grottmann P, et al. (2006) Contribution of the  $\text{Na}^+/\text{Ca}^{2+}$  Exchanger to Rapid  $\text{Ca}^{2+}$  Release in Cardiomyocytes. *Biophys J* 91: 779–792.
46. Schram G, Pourrier M, Melnyk P, Nattel S (2002) Differential Distribution of Cardiac Ion Channel Expression as a Basis for Regional Specialization in Electrical Function. *Circ Res* 90: 939–950.
47. Wang Z, Ferrmini B, Nattel S (1993) Delayed rectifier outward current and repolarization in human atrial myocytes. *Circ Res* 73: 276–285.
48. Benardeau A, Hatem SN, RuckerMartin C, LeGrand B, Mace L, et al. (1996) Contribution of  $\text{Na}^+/\text{Ca}^{2+}$  exchange to action potential of human atrial myocytes. *Am J Physiol Heart Circ Physiol* 40: H1151–H1161.
49. Feng J, Yue L, Wang Z, Nattel S (1998) Ionic Mechanisms of Regional Action Potential Heterogeneity in the Canine Right Atrium. *Circ Res* 83: 541–551.
50. Gong D, Zhang Y, Cai B, Meng Q, Jiang S, et al. (2008) Characterization and Comparison of  $\text{Na}^+$ ,  $\text{K}^+$  and  $\text{Ca}^{2+}$  Currents Between Myocytes from Human Atrial Right Appendage and Atrial Septum. *Cell Physiol Biochem* 21: 385–394.
51. Tsujimae K, Suzuki S, Murakami S, Kurachi Y (2007) Frequency-dependent effects of various  $\text{I}_{\text{Kr}}$  blockers on cardiac action potential duration in a human atrial model. *Am J Physiol Heart Circ Physiol* 293: H660–669.
52. Courtemanche M, Ramirez RJ, Nattel S (1999) Ionic targets for drug therapy and atrial fibrillation-induced electrical remodeling: insights from a mathematical model. *Cardiovasc Res* 42: 477–489.
53. Tsujimae K, Murakami S, Kurachi Y (2008) In silico study on the effects of  $\text{I}_{\text{Kr}}$  block kinetics on prolongation of human action potential after atrial fibrillation-induced electrical remodeling. *Am J Physiol Heart Circ Physiol* 294: H793–800.
54. Zhang HG, Garratt CJ, Zhu JJ, Holden AV (2005) Role of up-regulation of I-K1 in action potential shortening associated with atrial fibrillation in humans. *Cardiovasc Res* 66: 493–502.
55. Goette A, Honeycutt C, Langberg JJ (1996) Electrical Remodeling in Atrial Fibrillation: Time Course and Mechanisms. *Circulation* 94: 2968–2974.
56. Leistad E, Aksnes G, Verburg E, Christensen G (1996) Atrial Contractile Dysfunction After Short-term Atrial Fibrillation Is Reduced by Verapamil but Increased by BAY K8644. *Circulation* 93: 1747–1754.
57. Leistad E, Christensen G, Ilebakk A (1993) Atrial Contractile Performance after Cessation of Atrial-Fibrillation. *Am J Physiol* 264: H104–H109.
58. Sipido KR, Maes M, VandeWerf F (1997) Low efficiency of  $\text{Ca}^{2+}$  entry through the  $\text{Na}^+/\text{Ca}^{2+}$  exchanger as trigger for  $\text{Ca}^{2+}$  release from the sarcoplasmic reticulum - A comparison between L-type  $\text{Ca}^{2+}$  current and reverse-mode  $\text{Na}^+/\text{Ca}^{2+}$  exchange. *Circ Res* 81: 1034–1044.
59. Weisser-Thomas J, Piacentino V, Gaughan JP, Margulies K, Houser SR (2003) Calcium entry via  $\text{Na}/\text{Ca}$  exchange during the action potential directly contributes to contraction of failing human ventricular myocytes. *Cardiovasc Res* 57: 974–985.
60. Sher AA, Noble PJ, Hinch R, Gavaghan DJ, Noble D (2008) The role of the  $\text{Na}^+/\text{Ca}^{2+}$  exchangers in  $\text{Ca}^{2+}$  dynamics in ventricular myocytes. *Prog Biophys Mol Biol* 96: 377–398.
61. Schotten U, de Haan S, Verheule S, Harks EGA, Frechen D, et al. (2007) Blockade of atrial-specific  $\text{K}^+$ -currents increases atrial but not ventricular contractility by enhancing reverse mode  $\text{Na}^+/\text{Ca}^{2+}$ -exchange. *Cardiovasc Res* 73: 37–47.
62. Carmeliet E (2004) Intracellular  $\text{Ca}^{2+}$  concentration and rate adaptation of the cardiac action potential. *Cell Calcium* 35: 557–573.
63. Litwin SE, Li J, Bridge JHB (1998)  $\text{Na}-\text{Ca}$  exchange and the trigger for sarcoplasmic reticulum Ca release: Studies in adult rabbit ventricular myocytes. *Biophys J* 75: 359–371.
64. Pott C, Philipson KD, Goldhaber JI (2005) Excitation-contraction coupling in  $\text{Na}^+/\text{Ca}^{2+}$  exchanger knockout mice - Reduced transsarcolemmal  $\text{Ca}^{2+}$  flux. *Circ Res* 97: 1288–1295.
65. Weber CR, Piacentino V, Houser SR, Bers DM (2003) Dynamic regulation of sodium/calcium exchange function in human heart failure. *Circulation* 108: 2224–2229.
66. Han C, Tavi P, Weckstrom M (2002) Role of the  $\text{Na}(+)/\text{Ca}(2+)$  exchanger as an alternative trigger of CICR in mammalian cardiac myocytes. *Biophys J* 82: 1483–1496.
67. Stern MD, Cheng H (2004) Putting out the fire: what terminates calcium-induced calcium release in cardiac muscle? *Cell Calcium* 35: 591–601.
68. Stern MD (1992) Theory of excitation-contraction coupling in cardiac muscle. *Biophys J* 63: 497–517.
69. Maier LS, Bers DM (2007) Role of  $\text{Ca}^{2+}$ /calmodulin-dependent protein kinase (CaMK) in excitation-contraction coupling in the heart. *Cardiovasc Res* 73: 631–640.
70. Neef S, Dybkova N, Sossalla S, Ort KR, Fluschnik N, et al. (2010) CaMKII-Dependent Diastolic SR  $\text{Ca}^{2+}$  Leak and Elevated Diastolic  $\text{Ca}^{2+}$  Levels in Right Atrial Myocardium of Patients With Atrial Fibrillation. *Circ Res* 106: 1134–1144.
71. Fink M, Noble D (2009) Markov models for ion channels: versatility versus identifiability and speed. *Phil Trans Roy Soc A* 367: 2161–2179.
72. Bosch RF, Zeng XR, Grammer JB, Popovic K, Mewis C, et al. (1999) Ionic mechanisms of electrical remodeling in human atrial fibrillation. *Cardiovasc Res* 44: 121–131.
73. Dobrev D, Ravens U (2003) Remodeling of cardiomyocyte ion channels in human atrial fibrillation. *Basic Res Cardiol* 98: 137–148.
74. Wang Z, Ferrmini B, Nattel S (1993) Sustained depolarization-induced outward current in human atrial myocytes. Evidence for a novel delayed rectifier  $\text{K}^+$  current similar to Kv1.5 cloned channel currents. *Circ Res* 73: 1061–1076.
75. Gassanov N, Brandt MC, Michels G, Lindner M, Er F, et al. (2006) Angiotensin II-induced changes of calcium sparks and ionic currents in human atrial myocytes: Potential role for early remodeling in atrial fibrillation. *Cell Calcium* 39: 175–186.
76. Cussler EL (1997) Diffusion mass transfer in fluid systems. Cambridge: Cambridge University Press. xviii, 580 s. p.
77. Wagner J, Keizer J (1994) Effects of rapid buffers on  $\text{Ca}^{2+}$  diffusion and  $\text{Ca}^{2+}$  oscillations. *Biophys J* 67: 447–456.
78. Peskoff A, Langer GA (1998) Calcium concentration and movement in the ventricular cardiac cell during an excitation-contraction cycle. *Biophys J* 74: 153–174.
79. Robertson SP, Johnson JD, Potter JD (1981) The time-course of  $\text{Ca}^{2+}$  exchange with calmodulin, troponin, parvalbumin, and myosin in response to transient increases in  $\text{Ca}^{2+}$ . *Biophys J* 34: 559–569.
80. Langer GA, Peskoff A (1996) Calcium concentration and movement in the diadic cleft space of the cardiac ventricular cell. *Biophys J* 70: 1169–1182.
81. Dobrev D, Nattel S (2008) Calcium Handling Abnormalities in Atrial Fibrillation as a Target for Innovative Therapeutics. *J Cardiovasc Pharmacol* 52: 293–299.
82. Korhonen T, Rapila R, Ronkainen V-P, Koivumäki JT, Tavi P (2010) Local  $\text{Ca}^{2+}$  releases enable rapid heart rates in developing cardiomyocytes. *J Physiol* 588: 1407–1417.
