# Supplementary material for: Impact of Sarcoplasmic Reticulum Calcium Release on Calcium Dynamics and Action Potential Morphology in Human Atrial Myocytes: A Computational Study
Source: PubMed Central journal article supplement (PMC3029229; doi:10.1371/journal.pcbi.1001067), 2011-01-27
Supplement: pcbi.1001067.s004.pdf [file pcbi.1001067.s004.pdf]

**Table S1.** Modified parameter values of the previously published model components

| Parameter    | Definition                                | Criteria for modification [ref]                          | Value                                |
|--------------|-------------------------------------------|----------------------------------------------------------|--------------------------------------|
| $P_{Na}$     | permeability of $I_{Na}$                  | Adjusting AP characteristics                             | 0.00182 nL/s                         |
| $g_{IK1}$    | conductance of $I_{K1}$                   | Adjusting end repolarization of AP and resting potential | 3.825 nS                             |
| $g_{ICab}$   | conductance of background calcium current | Adjusting diastolic $[Ca^{2+}]_i$                        | 0.0952 nS                            |
| $g_{INCX}$   | conductance of $I_{NCX}$                  | Adjusting calcium transient characteristics              | 0.008433945 pA/(mmol/L) <sup>4</sup> |
| $I_{CaPmax}$ | maximum pump rate of SL calcium pump      | Adjusting diastolic $[Ca^{2+}]_i$                        | 2 pA                                 |
| $K_{mf}$     | SERCA half-maximal binding in cytosol     | Adapted from [1]                                         | 0.00025 mM                           |
| $K_{mr}$     | SERCA half-maximal binding in SR          | Adapted from [1]                                         | 1.8 mM                               |
| $k_4$        | pumping rate from SERCA to SR             | Adapted from [2]                                         | 7.5 s <sup>-1</sup>                  |
| $C_{pumps}$  | concentration of SERCA                    | Based on [2] fitting of $Ca^{2+}$ removal by SERCA       | 0.04 mM                              |
| $k_{SRleak}$ | SR leak scaling parameter                 | Adjusting SR calcium content                             | 0.006 s <sup>-1</sup>                |

## REFERENCES

1. Shannon TR, Ginsburg KS, Bers DM (2000) Reverse mode of the sarcoplasmic reticulum calcium pump and load-dependent cytosolic calcium decline in voltage-clamped cardiac ventricular myocytes. *Biophysical Journal* 78: 322-333.
2. Bers DM (2001) *Excitation-contraction coupling and cardiac contractile force*. Dordrecht ; Boston: Kluwer Academic Publishers. xxiv, 427 p. p.
