# Supplementary material for: Impact of Sarcoplasmic Reticulum Calcium Release on Calcium Dynamics and Action Potential Morphology in Human Atrial Myocytes: A Computational Study
Source: PubMed Central journal article supplement (PMC3029229; doi:10.1371/journal.pcbi.1001067), 2011-01-27
Supplement: pcbi.1001067.s005.pdf [file pcbi.1001067.s005.pdf]

**Table S2.** Parameters of the novel RyR model

| Parameter      | Definition                     | Value                                               |
|----------------|--------------------------------|-----------------------------------------------------|
| $T_{RyRact}$   | RyR activation time constant   | 0.01875 s (0.005 s in subspace)                     |
| $T_{RyRinact}$ | RyR inactivation time constant | 0.0875 s (0.015 s in subspace)                      |
| $T_{RyRadapt}$ | RyR adaptation time constant   | 1 s                                                 |
| $V$            | RyR maximum flux               | 1 s <sup>-1</sup> (625 s <sup>-1</sup> in subspace) |
