# Supplementary material for: Impact of Sarcoplasmic Reticulum Calcium Release on Calcium Dynamics and Action Potential Morphology in Human Atrial Myocytes: A Computational Study
Source: PubMed Central journal article supplement (PMC3029229; doi:10.1371/journal.pcbi.1001067), 2011-01-27
Supplement: pcbi.1001067.s006.pdf [file pcbi.1001067.s006.pdf]

**Table S3.** Comparison of AP characteristics of the developed model (vCa) and the two extended variants (vCaNass and vCaNasslk) to experiments

| Parameter             | vCA   | vCaNass | vCaNasslk | Experimental value [ref]                                                       |
|-----------------------|-------|---------|-----------|--------------------------------------------------------------------------------|
| $V_{diast}$ (mV)      | -77.0 | -76.0   | -75.3     | -79.9 ± 1.3 [1]; T = 36°C<br>-75 ± 1 [2]; T = 35°C<br>-68 ± 8 [3]; T = 37°C    |
| $V_{syst}$ (mV)       | 41.7  | 41.6    | 41.7      | 35 ± 2.8 [1]; T = 36°C<br>53 ± 2 [4]; T = 37°C                                 |
| $V_{ampl}$ (mV)       | 118.8 | 117.7   | 117.0     | 98 ± 5 [5]; T = 36°C<br>118.33 ± 3.00 [6]; T = 36°C<br>130 ± 2 [4]; T = 37°C   |
| $dV/dt_{max}$ (mV/ms) | 170   | 169     | 168       | 167 ± 26 [5]; T = 36°C<br>231.9 ± 13.6 [6]; T = 36°C<br>172 ± 60 [7]; T = 31°C |
| $APD_{30}$ (ms)       | 10.6  | 10.8    | 10.8      | 13 ± 16 [7]; T = 31°C<br>13.9 ± 3.7 [8]; T = 23°C; 0.5 Hz                      |
| $APD_{50}$ (ms)       | 21.0  | 20.8    | 20.8      | 7.65 ± 1.12 [1]; T = 36°C<br>62 ± 91 [7]; T = 31°C<br>25 ± 3 [3]; T = 37°C     |
| $APD_{75}$ (ms)       | 145.4 | 148.4   | 136.0     | 141 ± 12 [9]; T = 37°C                                                         |
| $APD_{90}$ (ms)       | 239.4 | 244.4   | 246.8     | 204 ± 11 [10]; T = 36°C<br>237 ± 18 [9]; T = 37°C<br>255 ± 45 [11]; T = 35°C   |

## REFERENCES

1. Wang YG, Xu HY, Kumar R, Tipparaju SM, Wagner MB, et al. (2003) Differences in transient outward current properties between neonatal and adult human atrial myocytes. *Journal of Molecular and Cellular Cardiology* 35: 1083-1092.
2. Wettwer E, Hala O, Christ T, Heubach JF, Dobrev D, et al. (2004) Role of I-Kur in controlling action potential shape and contractility in the human atrium - Influence of chronic atrial fibrillation. *Circulation* 110: 2299-2306.
3. Dobrev D, Graf E, Wettwer E, Himmel HM, Hala O, et al. (2001) Molecular Basis of Downregulation of G-Protein-Coupled Inward Rectifying K<sup>+</sup> Current (I<sub>K,ACh</sub>) in Chronic Human Atrial Fibrillation: Decrease in GIRK4 mRNA Correlates With

Reduced  $I_{K,ACh}$  and Muscarinic Receptor-Mediated Shortening of Action Potentials. *Circulation* 104: 2551-2557.

4. Workman AJ, Kane KA, Russell JA, Norrie J, Rankin AC (2003) Chronic beta-adrenoceptor blockade and human atrial cell electrophysiology: evidence of pharmacological remodelling. *Cardiovasc Res* 58: 518-525.
5. Wang Z, Pelletier L, Talajic M, Nattel S (1990) Effects of flecainide and quinidine on human atrial action potentials. Role of rate-dependence and comparison with guinea pig, rabbit, and dog tissues. *Circulation* 82: 274-283.
6. Lagrutta A, Wang JX, Fermini B, Salata JJ (2006) Novel, potent inhibitors of human Kv1.5 K<sup>+</sup> channels and ultrarapidly activating delayed rectifier potassium current. *Journal of Pharmacology and Experimental Therapeutics* 317: 1054-1063.
7. Dawodu AA, Monti F, Iwashiro K, Schiariti M, Chiavarelli R, et al. (1996) The shape of human atrial action potential accounts for different frequency-related changes in vitro. *Int J Cardiol* 54: 237-249.
8. Neef S, Dybkova N, Sossalla S, Ort KR, Fluschnik N, et al. CaMKII-Dependent Diastolic SR Ca<sup>2+</sup> Leak and Elevated Diastolic Ca<sup>2+</sup> Levels in Right Atrial Myocardium of Patients With Atrial Fibrillation. *Circ Res* 106: 1134-1144.
9. Pau D, Workman AJ, Kane KA, Rankin AC (2005) Electrophysiological effects of prucalopride, a novel enterokinetic agent, on isolated atrial myocytes from patients treated with beta-adrenoceptor antagonists. *J Pharmacol Exp Ther* 313: 146-153.
10. Dobrev D, Ravens U (2003) Remodeling of cardiomyocyte ion channels in human atrial fibrillation. *Basic Res Cardiol* 98: 137-148.
11. Bosch RF, Zeng XR, Grammer JB, Popovic K, Mewis C, et al. (1999) Ionic mechanisms of electrical remodeling in human atrial fibrillation. *Cardiovasc Res* 44: 121-131.
