# Supplementary material for: Impact of Sarcoplasmic Reticulum Calcium Release on Calcium Dynamics and Action Potential Morphology in Human Atrial Myocytes: A Computational Study
Source: PubMed Central journal article supplement (PMC3029229; doi:10.1371/journal.pcbi.1001067), 2011-01-27
Supplement: pcbi.1001067.s007.pdf [file pcbi.1001067.s007.pdf]

**Table S4.** Initial values for the differential variables at 1 Hz pacing steady-state

| Parameter          | Definition                                                                          | Value    |
|--------------------|-------------------------------------------------------------------------------------|----------|
| $V_m$              | membrane voltage (mV)                                                               | -77,1494 |
| $I_{Nam}$          | $I_{Na}$ gating variables                                                           | 0,00225  |
| $I_{Nah1}$         |                                                                                     | 0,92828  |
| $I_{Nah2}$         |                                                                                     | 0,92661  |
| $I_{Cald}$         | $I_{CaL}$ gating variables                                                          | 7,89E-06 |
| $I_{Calf1}$        |                                                                                     | 0,9991   |
| $I_{Calf2}$        |                                                                                     | 0,9991   |
| $I_{Calfca}$       |                                                                                     | 0,97263  |
| $I_{tr}$           | $I_t$ gating variables                                                              | 8,21E-04 |
| $I_{ts}$           |                                                                                     | 0,96044  |
| $I_{susr}$         | $I_{sus}$ gating variables                                                          | 1,11E-04 |
| $I_{suss}$         |                                                                                     | 0,99516  |
| $I_{Ksn}$          | $I_{Ks}$ gating variable                                                            | 0,00404  |
| $I_{Krpa}$         | $I_{Kr}$ gating variable                                                            | 3,16E-05 |
| $I_{fy}$           | $I_f$ gating variable                                                               | 0,06216  |
| $RyR_{oss}$        | values of RyR gating variables (open, closed, adaptation) in different compartments | 5,14E-05 |
| $RyR_{css}$        |                                                                                     | 0,99994  |
| $RyR_{ass}$        |                                                                                     | 0,24361  |
| $RyR_{oc1}$        |                                                                                     | 1,01E-04 |
| $RyR_{cc1}$        |                                                                                     | 0,99932  |
| $RyR_{ac1}$        |                                                                                     | 0,19145  |
| $RyR_{oc2}$        |                                                                                     | 8,47E-05 |
| $RyR_{cc2}$        |                                                                                     | 0,99947  |
| $RyR_{ac2}$        |                                                                                     | 0,19984  |
| $RyR_{oc3}$        |                                                                                     | 6,47E-05 |
| $RyR_{cc3}$        |                                                                                     | 0,99955  |
| $RyR_{ac3}$        |                                                                                     | 0,21486  |
| $[SERCaCa^{2+}]_1$ | concentrations of $Ca^{2+}$ bound to SERCA in cytosolic                             | 0,00458  |

|                       |                                                         |          |
|-----------------------|---------------------------------------------------------|----------|
| $[SERCACa^{2+}]_2$    | compartments (mM)                                       | 0,00446  |
| $[SERCACa^{2+}]_3$    |                                                         | 0,00428  |
| $[SERCACa^{2+}]_{ss}$ |                                                         | 0,00424  |
| $[Na^+]_i$            | cytosolic $Na^+$ concentration (mM)                     | 9,43843  |
| $[K^+]_i$             | cytosolic $K^+$ concentration (mM)                      | 134,366  |
| $[Ca^{2+}]_{ss}$      | $Ca^{2+}$ concentrations in cytosolic compartments (mM) | 1,68E-04 |
| $[Ca^{2+}]_{c1}$      |                                                         | 1,36E-04 |
| $[Ca^{2+}]_{c2}$      |                                                         | 1,40E-04 |
| $[Ca^{2+}]_{c3}$      |                                                         | 1,47E-04 |
| $[Ca^{2+}]_{c4}$      |                                                         | 1,61E-04 |
| $[Ca^{2+}]_{SR1}$     | $Ca^{2+}$ concentrations in SR compartments (mM)        | 0,61372  |
| $[Ca^{2+}]_{SR2}$     |                                                         | 0,60256  |
| $[Ca^{2+}]_{SR3}$     |                                                         | 0,58564  |
| $[Ca^{2+}]_{SR4}$     |                                                         | 0,56883  |
